# Supplementary material for: Myeloid-Derived Suppressor Cells Produce IL-10 to Elicit DNMT3b-Dependent IRF8 Silencing to Promote Colitis-Associated Colon Tumorigenesis
Source: PubMed Central journal article supplement — Cell Rep. Author manuscript; Available in PMC 2019 Jan 4. (PMC6319669; doi:10.1016/j.celrep.2018.11.050), 2018-12-11
Supplement: NIHMS1517191-supplement-2.pdf [file NIHMS1517191-supplement-2.pdf]

## Myeloid-Derived Suppressor Cells Produce IL-10 to Elicit DNMT3b-Dependent IRF8 Silencing to Promote Colitis-Associated Colon Tumorigenesis

### Graphical Abstract

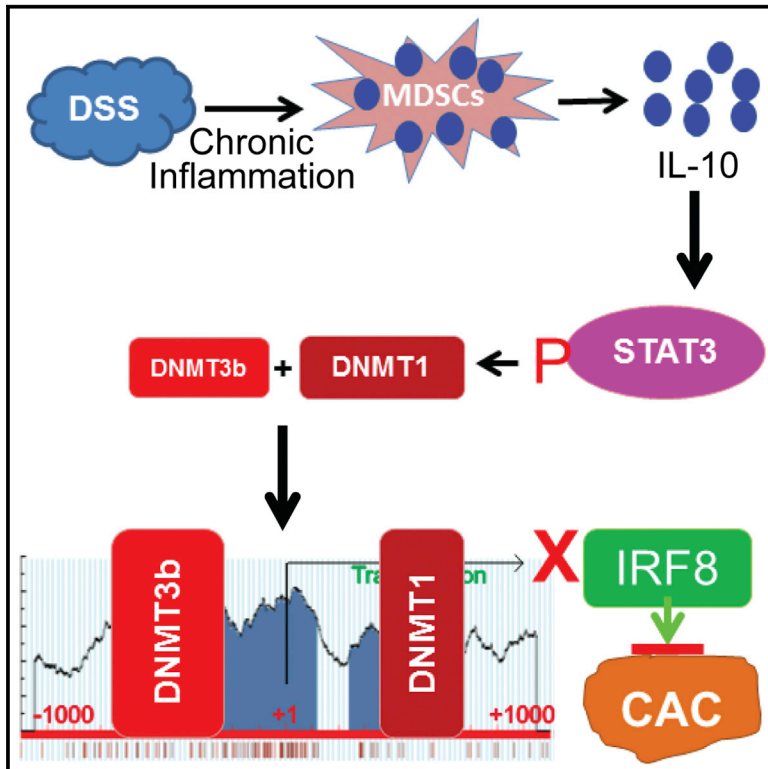

### Authors

Mohammed L. Ibrahim, John D. Klement, Chunwan Lu, ..., Phillip J. Buckhaults, Herbert C. Morse III, Kebin Liu

### Correspondence

kliu@augusta.edu

### In Brief

Ibrahim et al. report that chronic inflammation induces colonic accumulation of myeloid-derived suppressor cells (MDSCs) that upregulates IL-10. IL-10 directly regulates STAT3 activation to upregulate DNMT3b to silence tumor suppressor IRF8 in colonic epithelial cells. The MDSC-IL-10-STAT3-DNMT3b-IRF8 pathway links chronic inflammation to colon cancer initiation.

### Highlights

- Chronic inflammation increases colonic myeloid-derived suppressor cells (MDSCs)
- The majority of IL-10<sup>+</sup> cells are MDSCs in the inflamed colon
- IL-10 activates STAT3 to upregulate DNMT3b to methylate the *Irf8* promoter
- IRF8 is a suppressor of inflammation-induced colon cancer

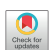

# Myeloid-Derived Suppressor Cells Produce IL-10 to Elicit DNMT3b-Dependent IRF8 Silencing to Promote Colitis-Associated Colon Tumorigenesis

Mohammed L. Ibrahim,<sup>1,3</sup> John D. Klement,<sup>1,3,4</sup> Chunwan Lu,<sup>1,3,4</sup> Priscilla S. Redd,<sup>1,3,4</sup> Wei Xiao,<sup>1,3</sup> Dafeng Yang,<sup>1,3,4</sup> Darren D. Browning,<sup>1,3</sup> Natasha M. Savage,<sup>2</sup> Phillip J. Buckhaults,<sup>5</sup> Herbert C. Morse III,<sup>6</sup> and Kebin Liu<sup>1,3,4,7,\*</sup>

<sup>1</sup>Department of Biochemistry and Molecular Biology, Medical College of Georgia, Augusta, GA 30912, USA

<sup>2</sup>Department of Pathology, Medical College of Georgia, Augusta, GA 30912, USA

<sup>3</sup>Georgia Cancer Center, Augusta University, Augusta, GA 30912, USA

<sup>4</sup>Charlie Norwood VA Medical Center, Augusta, GA 30904, USA

<sup>5</sup>Department of Drug Discovery and Biomedical Sciences, the University of South Carolina, Columbia, SC 29208, USA

<sup>6</sup>Virology and Cellular Immunology Section, Laboratory of Immunogenetics, National Institute of Allergy and Infectious Diseases, NIH, Rockville, MD 20852, USA

<sup>7</sup>Lead Contact

\*Correspondence: [kliu@augusta.edu](mailto:kliu@augusta.edu)

<https://doi.org/10.1016/j.celrep.2018.11.050>

## SUMMARY

IL-10 functions as a suppressor of colitis and colitis-associated colon cancer, but it is also a risk locus associated with ulcerative colitis. The mechanism underlying the contrasting roles of IL-10 in inflammation and colon cancer is unknown. We report here that inflammation induces the accumulation of CD11b<sup>+</sup>Gr1<sup>+</sup> myeloid-derived suppressor cells (MDSCs) that express high levels of IL-10 in colon tissue. IL-10 induces the activation of STAT3 that directly binds to the *Dnmt1* and *Dnmt3b* promoters to activate their expression, resulting in DNA hypermethylation at the *Irf8* promoter to silence IRF8 expression in colon epithelial cells. Mice with *Irf8* deleted in colonic epithelial cells exhibit significantly higher inflammation-induced tumor incidence. Human colorectal carcinomas have significantly higher DNMT1 and DNMT3b and lower IRF8 expression, and they exhibit significantly higher *IRF8* promoter DNA methylation than normal colon. Our data identify the MDSC-IL-10-STAT3-DNMT3b-IRF8 pathway as a link between chronic inflammation and colon cancer initiation.

## INTRODUCTION

Patients with inflammatory bowel disease (IBD), particularly ulcerative colitis (UC), have a significantly higher risk of developing colorectal cancer (CRC). Colitis-associated colorectal cancer (CAC) is considered the most serious complication of IBD (Lasry et al., 2016). Interferon regulatory factor 8 (IRF8) is a transcription factor of the interferon (IFN) regulatory factor family, which plays an essential role in lineage-specific hematopoietic differentiation (Feng et al., 2011; Holtschke

et al., 1996; Kim et al., 2015). IRF8 is also expressed and functional in non-hematopoietic epithelial cells (Yan et al., 2016). Genome-wide association studies (GWASs) have implied that IRF8 plays a role in IBD (Barrett et al., 2008; Elding et al., 2013; Jostins et al., 2012). More recently, IRF8 has been shown to function as a critical regulator of inflammation through regulating cytokine production and pyroptosis (Karki et al., 2018). However, the mechanism underlying IRF8 function in CAC is unknown.

Interleukin 10 (IL-10) is historically considered to be an anti-inflammatory cytokine that functions to suppress chronic inflammation and CAC (Lee et al., 2016b; Moschen et al., 2016; Murata et al., 2015). However, IL-10 also plays a key role in the modulation of host cancer immune surveillance (Dennis et al., 2015; Mumm et al., 2011). Overexpression of IL-10 or treatment with a pegylated IL-10 led to tumor rejection and long-lasting tumor immunity in tumor-bearing mice (Oft, 2014). IL-10 suppresses tumor development through inducing cytotoxic T lymphocyte (CTL) activation (Mumm et al., 2011) and inhibiting inflammatory cytokine production to hamper Treg and myeloid-derived suppressor cells (MDSCs) (Tanikawa et al., 2012). IL-10 is also identified by GWASs as being associated with IBD (Jostins et al., 2012). Inconsistent with GWAS observations, IL-10 also has been shown to act as a tumor promoter. An IL-10 autocrine or paracrine loop enhances tumor cell survival and escape from host immune surveillance (Gonzalez-Aparicio et al., 2011; Ruffell et al., 2014). However, the molecular mechanisms underlying the complex functions of IL-10 as an anti-inflammatory cytokine and an IBD-associated risk factor and the contrasting roles of IL-10 in cancer immune surveillance and tumor evasion have not been identified.

We aimed at determining the mechanistic link between IL-10 and IRF8 in the context of chronic colonic inflammation and to test the hypothesis that IRF8 is a CAC suppressor. To this end, we determined that the MDSC-IL-10-signal transducer and activator of transcription 3 (STAT3)-DNA methyltransferase (DNMT) 3b-IRF8 pathway links chronic inflammation to colon cancer initiation.

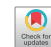

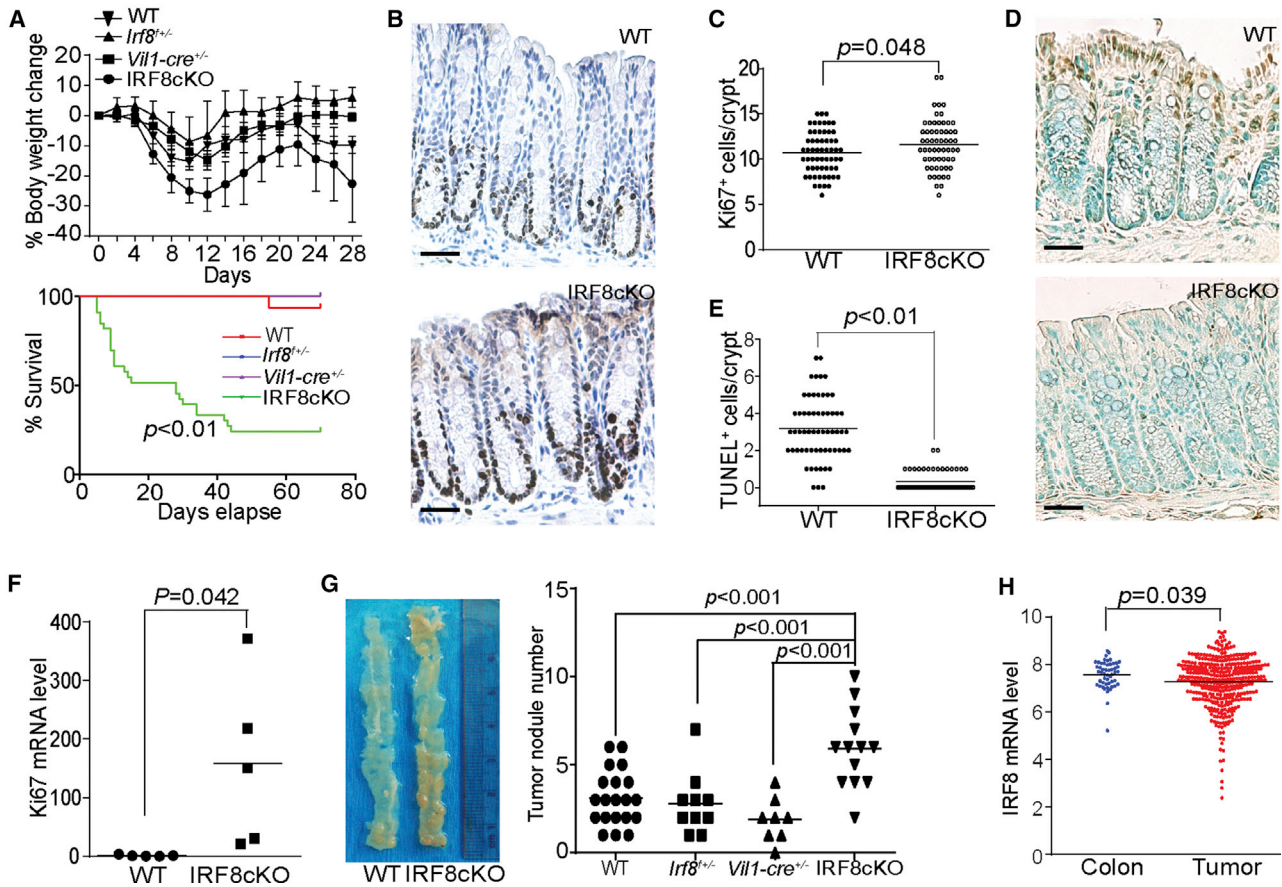

**Figure 1. IRF8 Is a Tumor Suppressor of Chronic Inflammation-Induced Colon Cancer**

(A) WT C57BL/6 (n = 6), heterogenous villin-cre (*Vil1-cre*<sup>+/-</sup>) (n = 8), heterogenous *Irf8*-floxed (*Irf8*<sup>+/-</sup>) (n = 10), and IRF8cKO (n = 13) mice were injected with AOM and then treated with 2% DSS-water cycles, as described in the [Method Details](#). Mice were weighed every 2 days for 28 days. For survival analysis, WT C57BL/6 (n = 16), *Vil1-cre*<sup>+/-</sup> (n = 8), *Irf8*<sup>+/-</sup> (n = 10), and IRF8cKO (n = 33) mice were injected with AOM and then treated with the 2% DSS-water cycles. Mice survival was recorded and plotted against days.

(B and C) Colon tissue from 3-month-old male WT (n = 3) and IRF8cKO (n = 3) mice without any treatment were sectioned and stained with the Ki67-specific antibody. Shown are representative images of one of the three mice (B). Scale bar, 50  $\mu$ m. (C) Ki67<sup>+</sup> cells were quantified in 20 crypts per mouse and presented in (C).

(D and E) Colon tissue from 3-month-old male WT (n = 3) and IRF8cKO (n = 3) mice without any treatment were sectioned and stained by TUNEL. Shown are representative images of one of the three mice (D). Scale bar, 50  $\mu$ m. TUNEL<sup>+</sup> cells were quantified in 20 crypts per mouse and presented in (E).

(F) Colon tissues were collected from WT (n = 5) and IRF8cKO (n = 5) mice and analyzed by qPCR using mouse Ki67 cDNA-specific primers.  $\beta$ -Actin was used as an internal control. Each column represents the mean of triplicates of one mouse. Five mice were used in each group.

(G) WT C57BL/6 (n = 20), *Vil1-cre*<sup>+/-</sup> (n = 8), *Irf8*<sup>+/-</sup> (n = 10), and IRF8cKO (n = 13) mice were treated with the AOM/DSS-water cycles, as described in the [Method Details](#). Shown are representative images of tumor-bearing colon tissues from WT and IRF8cKO mice (left). The tumor nodule numbers were quantified (right).

(H) IRF8 mRNA expression datasets of human colon carcinoma (n = 380) and normal colon tissues (n = 51) were extracted from TCGA database and compared.

## RESULTS

### IRF8 Functions as a Suppressor of Spontaneous Colon Cancer

Mice with IRF8 deficiency only in colon epithelial cells (termed IRF8cKO) were created by crossing *Irf8*-floxed mice with villin-cre mice ([Figures S1A and S1B](#)) with the deletion of exon 2 ([Figure S1C](#)). As reported in the literature, we observed that IRF8cKO mice exhibit elevated levels of CD11b<sup>+</sup>Gr1<sup>+</sup> MDSCs as compared to wild-type (WT) mice. However, IRF8cKO mice exhibit similar levels of CD11b<sup>+</sup>Gr1<sup>+</sup> MDSCs to WT mice ([Figures S2A and S2C](#)). The profiles of CD4<sup>+</sup> and CD8<sup>+</sup> T cells in IRF8cKO

mice are also similar to those of WT mice ([Figures S2B and S2C](#)). IRF8cKO mice are more susceptible to chronic inflammation because dextran sodium sulfate (DSS) treatment resulted in significantly greater weight loss and higher mortality as compared to C57BL/6, heterogenous *Irf8*-floxed (*Irf8*<sup>+/-</sup>), and heterogenous villin-cre (*Vil1-cre*<sup>+/-</sup>) control mice ([Figure 1A](#)). IRF8 deficiency also results in significantly increased numbers of Ki67<sup>+</sup> colon epithelial cells in the stem cell and amplifying proliferating cell zones of the crypt as compared to WT mice ([Figures 1B and 1C](#)). Epithelial cells in the differentiating cell zone of the colon exhibit high levels of spontaneous apoptosis. IRF8 deficiency results in significantly decreased spontaneous apoptosis of these

differentiating cells (Figures 1D and 1E). The *Ki67* mRNA level is also significantly higher in the colon of IRF8cKO mice as compared to WT mice (Figure 1F). The IRF8 WT control mice and IRF8cKO mice were then treated with three cycles of azoxymethane (AOM)-DSS, and the colon tissues were analyzed for tumor nodules. Significantly more tumor nodules were observed in the colon tissues of IRF8cKO mice as compared to the C57BL/6, *Irf8*<sup>f/f</sup>, and *Vil1-cre*<sup>f/f</sup> control mice (Figure 1G). Analysis of IRF8 mRNA levels in normal human colon and colorectal carcinoma revealed that IRF8 is downregulated in the tumor tissues as compared to normal tissues (Figure 1H). We therefore conclude that IRF8 is a suppressor of inflammation-induced spontaneous colon cancer.

### Chronic Inflammation Silences IRF8 Expression

An IRF8-GFP reporter mouse was used to monitor IRF8 expression (Wang et al., 2014). IRF8 is expressed in the colon crypt in a gradient pattern, with the highest IRF8 protein levels in the differentiating and differentiated cell zones and relatively low levels in the amplifying proliferating and stem cell zones of tumor-free mice. However, IRF8 expression is silenced in the AOM-DSS-treated mice with colon cancer (Figure 2A). RT-PCR and western blotting analysis validated that IRF8 mRNA and protein levels are higher in colon tissues from tumor-free mice than in tumor-bearing colon tissues from AOM-DSS-treated mice (Figure 2B). The IRF8 protein level in normal colon tissue is as high as it is in myeloid cells (Figure 2C). IRF8-GFP reporter mice were then treated with DSS only, followed by water recovery. DSS treatment alone is sufficient to diminish IRF8 protein levels in colon epithelial cells, and IRF8 is silenced approximately 21 days after DSS treatment (Figure 2D). RT-PCR and western blotting analysis of the colon tissues validated that *Irf8* expression is silenced 21 days after treatment with DSS (Figure 2E). These observations demonstrate that chronic inflammation silences IRF8 expression in colon epithelial cells.

### Chronic Inflammation Induces the *Irf8* Promoter DNA Hypermethylation in Colon Carcinoma Cells

Because IRF8 is silenced in colon carcinoma cells by DNA methylation (McGough et al., 2008), we hypothesized that DSS-induced inflammation silences IRF8 expression in colon epithelial cells. To test this hypothesis, we analyzed DNA methylation in the *Irf8* promoter in normal colon and tumor-bearing colon tissues. The *Irf8* promoter contains a CpG island (Figure 3A). Bisulfite DNA sequencing revealed no methylated CpG in normal colon tissues. However, the majority of CpGs were methylated in the AOM-DSS-induced colon tumor tissues (Figure 3A). Methylation-sensitive PCR validated that the *Irf8* promoter DNA is hypermethylated (Figure 3B). The *Irf8* promoter CpG island is partially methylated in the human colon epithelial CCD841 cells but heavily methylated in human colon carcinoma HCT116 cells (Figure 3C). Analysis of The Cancer Genome Atlas (TCGA) datasets revealed the *Irf8* promoter DNA has significantly higher methylation levels in tumors than in normal colon tissue (Figure 3D). Knocking out DNMT1 alone results in no demethylation of the *Irf8* promoter and a minimal increase in IRF8 expression, whereas knocking out DNMT3b alone results in demethylation of the *Irf8* promoter and upregulation of IRF8 expression in

HCT116 cells. However, knocking out both DNMT1 and DNMT3b leads to demethylation of the *Irf8* promoter and upregulation of IRF8 expression in HCT116 cells (Figures 3E and 3F). We therefore conclude that DSS-induced chronic inflammation upregulates DNMT1 and DNMT3b to methylate the *Irf8* promoter.

### Chronic Inflammation Induces Upregulation of DNMT1 and DNMT3b in Colon Epithelial Cells

DNMT1 and DNMT3b protein and transcript levels are significantly higher in tumor tissues as compared to normal colon tissues, whereas DNMT3a expression levels are not significantly different between the normal and the tumor-bearing colon tissues (Figure 4A). DNMT1 and DNMT3b expression levels are also significantly higher in human colorectal carcinoma tissues as compared to normal colon tissues (Figure 4B). DSS treatment induces inflammation in the mouse colon, and the degree of inflammation increases with time, with the highest inflammation grade observed 21 days after DSS treatment (Figure 4C). DNMT3a is constitutively expressed in colon tissues, and the expression of DNMT1 and DNMT3b is upregulated approximately 21 days after DSS treatment (Figure 4D). We therefore conclude that DSS-induced chronic inflammation upregulates DNMT1 and DNMT3b in the colon.

### MDSCs and IL-10 Are Increased in the Inflamed Colon

DSS treatment increased the expression levels of IL-6, IL-10, IL-22, IFN $\gamma$ , and CD11b in the colon (Figures 5A and S3). The upregulation kinetics of IL-10 and CD11b correlate with IRF8 silencing in the colon tissue (Figures 2 and 5A). CD11b and IL-10 are elevated in tumor-bearing tissues as compared to normal colon tissues (Figure 5B), and IL-10 is elevated in CD11b<sup>+</sup> cells upon DSS-induced inflammation (Figure S4). Consistent with increased CD11b expression, analysis of spleen cells from DSS-treated mice validated that CD11b<sup>+</sup>Gr1<sup>+</sup> MDSCs are significantly increased after DSS treatment (Figures 5C and 5D). CD4<sup>+</sup> and CD8<sup>+</sup> T cell frequencies only decreased 21 days after DSS treatment but recovered at day 28 (Figure S5). Cells were then extracted from the lamina propria of colon tissues and analyzed for MDSC frequencies. It is clear that DSS treatment also significantly increased MDSC frequencies in the lamina propria (Figure 5E). DSS treatment significantly increased the frequencies of IL-10<sup>+</sup> cells in the spleen (Figures 5F and 5G) and the lamina propria (Figures 5H and 5I). Furthermore, the majority of IL-10<sup>+</sup> cells in both spleen and the lamina propria are also CD11b<sup>+</sup>Gr1<sup>+</sup> (Figures 5F–5I). We therefore conclude that DSS-induced inflammation increases CD11b<sup>+</sup>Gr1<sup>+</sup> MDSCs that produce IL-10.

### IL-10 Upregulates DNMT1 and DNMT3b Expression in Colon Epithelial Cells

To determine whether IL-10 regulates DNMT1 and DNMT3b expression, we treated CCD841 and HT29 cells with recombinant IL-10 protein. RT-PCR analysis revealed that IL-10 stimulated DNMT1 and DNMT3b expression in a dose-dependent manner (Figure 6A). Western blot analyses show that DNMT1 and DNMT3b protein levels are increased and the IRF8 protein level is decreased in IL-10-treated cells (Figure 6B). To validate



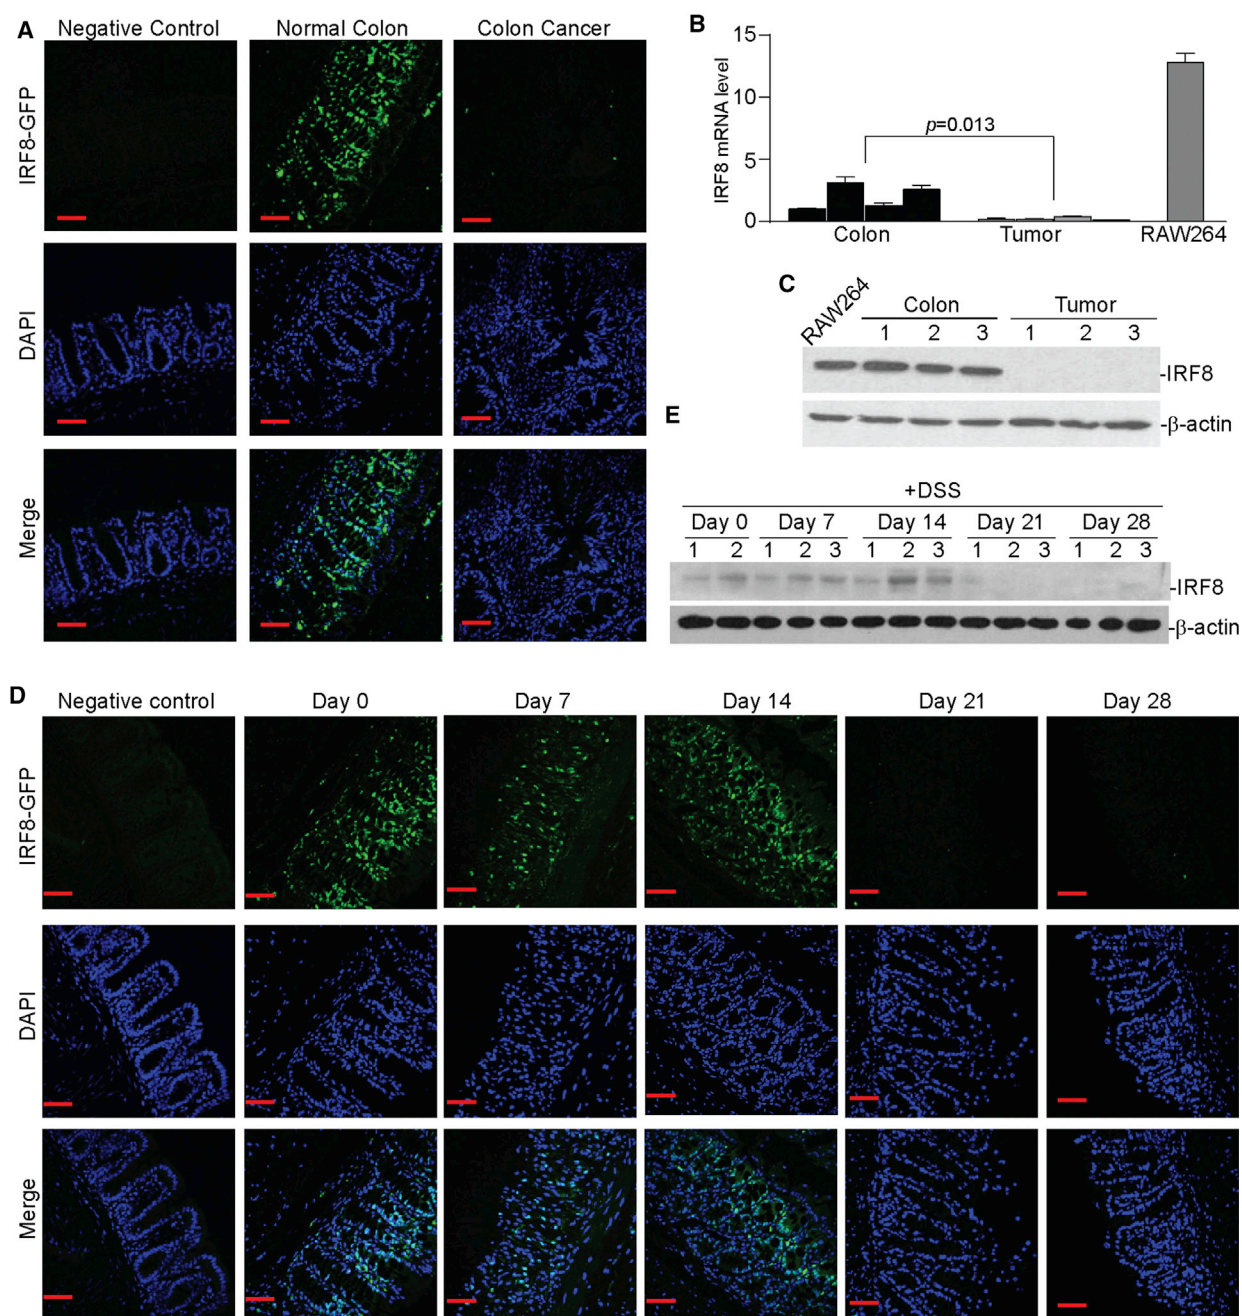

### Figure 2. Chronic Inflammation Silences IRF8 Expression in Colonic Epithelial Cells

(A) IRF8-GFP reporter mice were treated with the AOM-DSS cycle to induce colitis-associated colon cancer. Colon tissues from normal (negative control,  $n = 3$ ), untreated IRF8-GFP reporter (normal colon,  $n = 3$ ), and AOM-DSS-treated GFP-reporter (colon cancer,  $n = 3$ ) mice were fixed and frozen. The frozen sections were stained with DAPI and analyzed for GFP fluorescence intensity using a confocal microscope. Shown are representative images. Scale bar, 50  $\mu$ m.

(B) RNA was extracted from the colon tissues of tumor-free (colon,  $n = 4$ ) and tumor-bearing (tumor,  $n = 4$ ) mice and cultured RAW264 cells and analyzed for IRF8 mRNA expression levels by qPCR using IRF8-specific primers.  $\beta$ -Actin was used as an internal control. Each column represents the mean of triplicates from one mouse. Four mice were included in each group. Bar, SD. RAW264 was used as a positive control for IRF8 expression.

(C) Colon tissues of tumor-free (colon,  $n = 3$ ) and tumor-bearing (tumor,  $n = 3$ ) mice and cultured RAW264 cells were lysed and analyzed by western blotting analysis using IRF8-specific antibody.  $\beta$ -Actin was used as a normalization control.

(D) IRF8-GFP reporter mice were treated with DSS in drinking water for 7 days, followed by drinking water for 14 days, then DSS again for 7 days. Colon tissues were collected at days 0, 7, 14, 21, and 28 and analyzed for GFP fluorescence intensity. Normal mice were used as negative controls. Scale bar, 50  $\mu$ m.

(E) Total protein lysate was prepared from the colon tissue of mice as in (C) at days 0, 7, 14, 21, and 28 and analyzed for IRF8 protein level by western blotting.  $\beta$ -Actin was used as a normalization control.

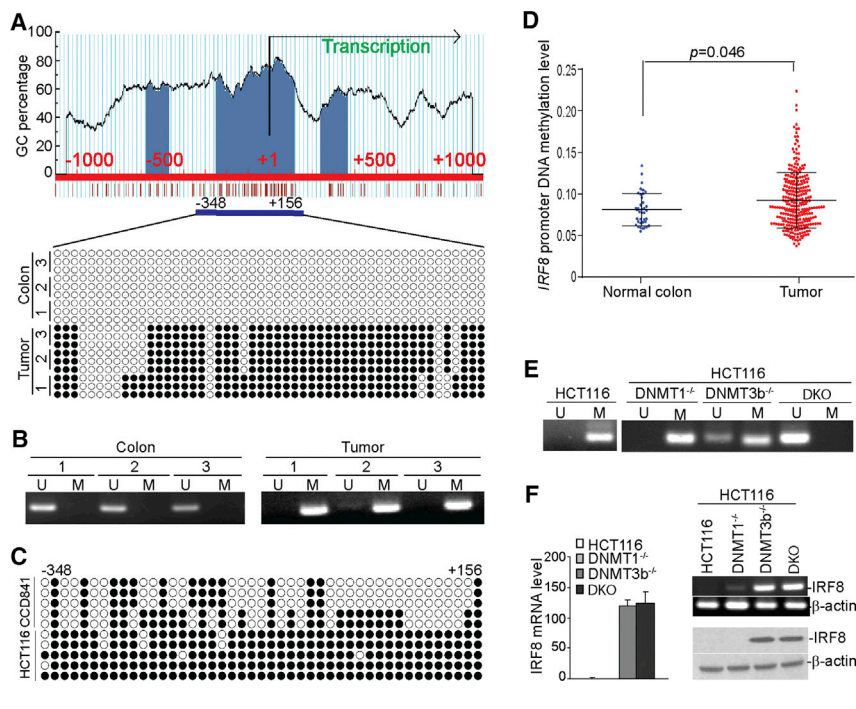

**Figure 3. The *Irf8* Promoter Is Hypermethylated in Chronic Inflammation-Induced Colon Tumor**

(A) The mouse *Irf8* promoter structure. The CpG islands are indicated by blue, transcription initiation site is indicated by +1. The numbers above the bar indicate the nucleotide location relative to the *Irf8* transcription initiation site. Bottom: genomic DNA was extracted from the colon tissues of normal tumor-free mice (n = 3) and the colon tumor tissues of AOM-DSS-treated mice (n = 3) and modified with bisulfite. The modified genomic DNA was then amplified with bisulfite-modified DNA-specific primers to amplify a CpG island region, as indicated under the CpG island (−348 to +156). The amplified DNA fragments were cloned and sequenced. Each circle represents a CpG dinucleotide. Open circles indicate unmethylated CpG, and closed circles represent methylated CpG.

(B) The bisulfite-modified genomic DNA as in (A) was also analyzed by methylation-specific (MS)-PCR. U, unmethylated; M, methylated.

(C) Bisulfite-sequencing analysis of the CpG island region in the *Irf8* promoter of colon epithelial CCD841 and colon carcinoma HCT116 cells. Each circle represents a CpG dinucleotide. Open circles indicate unmethylated CpG, and closed circles represent methylated CpG.

(D) The *Irf8* promoter DNA methylation datasets of normal human colon tissues and colorectal carcinoma tissues were extracted from TCGA database and compared.

(E) MS-PCR analysis of the *Irf8* promoter region in WT, DNMT1<sup>−/−</sup>, DNMT3b<sup>−/−</sup> and DKO of HCT116 cells. U, unmethylated; M, methylated.

(F) RNA was extracted from WT, DNMT1<sup>−/−</sup>, DNMT3b<sup>−/−</sup>, and DKO of HCT116 cells and analyzed for IRF8 mRNA expression levels by semiquantitative RT-PCR (right top) and qPCR (left) using  $\beta$ -actin as an internal control. Bar, SD. Bottom right: the IRF8 protein level was analyzed by western blotting using IRF8-specific antibody.  $\beta$ -Actin was used as a normalization control.

the above findings that IL-10 regulates DNMT1 and DNMT3b expression in colon epithelial cells, we treated WT and IL-10 KO mice with DSS and analyzed colon tissues for DNMT1 and DNMT3b protein levels. Western blot analyses indicate high DNMT1 protein levels in the colon tissues from DSS-treated mice. However, DSS failed to induce DNMT3b in the colon tissues of IL-10 KO mice (Figure 6C). Furthermore, colon tissues from IL-10 KO mice exhibited significantly higher IRF8 expression levels after DSS treatment (Figure 6D). Luciferase reporter assay with methylated *Irf8* promoter indicated that methylation silences *Irf8* promoter activity (Figure 6E). These observations indicate that IL-10 upregulates DNMT3b expression in colon epithelial cells to silence IRF8 expression *in vivo*.

### IL-10 Upregulates DNMT1 and DNMT3b Expression through the Activation of STAT3

DSS treatment induced the activation of both STAT1 and STAT3 (Figure 7A). STAT3 activation kinetics correlate with DNMT1 and DNMT3b upregulation (Figures 4D and 7A). IL-10 has been implicated in the induction of STAT3 activation in fibroblasts (Albregues et al., 2015). We therefore sought to test the hypothesis that IL-10 activates STAT3 to upregulate the expression of DNMT1 and DNMT3b in colon epithelial cells. We observed that IL-10 treatment induced STAT3 activation in both normal colon epithelial cells and colon carcinoma cells (Figure 7B). IFN $\gamma$  treatment activated STAT1 and increased IRF8 expression in HT29 and CCD841 cells *in vitro* (Figure S6A). IL-6 and IL-22 treat-

ments did not induce STAT1 activation (Figure S6A), but they did induce STAT3 activation, the upregulation of DNMT1 and DNMT3b, and the downregulation of IRF8 (Figures S6A and S6B).

To determine whether the activated STAT3 directly regulates DNMT1 and DNMT3b expression, CCD841 and HT29 cells were treated with IL-10 and analyzed for phospho-STAT3 (pSTAT3) protein binding to the *Dnmt1* and *Dnmt3b* promoter chromatin. Chromatin immunoprecipitation (ChIP) analysis revealed that pSTAT3 binds to the *Dnmt1* promoter region downstream of the *Dnmt1* transcription initiation site (Figure 7C), whereas pSTAT3 binds to the *Dnmt3b* promoter region upstream of the *Dnmt3b* transcription initiation site (Figure 7D). The DNMT1 (P2 fragment, Figure 7E) and DNMT3b (P4 fragment, Figure 7F) promoter DNA regions that contain the pSTAT3-binding sites were cloned to the luciferase reporter, respectively. The adjacent DNA fragments (P1 fragment, Figure 7E, and P3 fragment, Figure 7F) were also cloned to the luciferase reporter plasmid. While insertion of the pSTAT3-binding site DNA fragments did not increase DNMT1 or DNMT3b promoter activity in CCD841 and HT29 cells, IL-10 treatment induces significantly higher reporter activity in both CCD841 and HT29 cells transfected with the pSTAT3-binding site DNA fragments as compared to cells transfected with the negative control DNA fragments (Figures 7E and 7F). Our data determine that IL-10 activates STAT3 to upregulate DNMT1 and DNMT3b expression in colon epithelial cells.



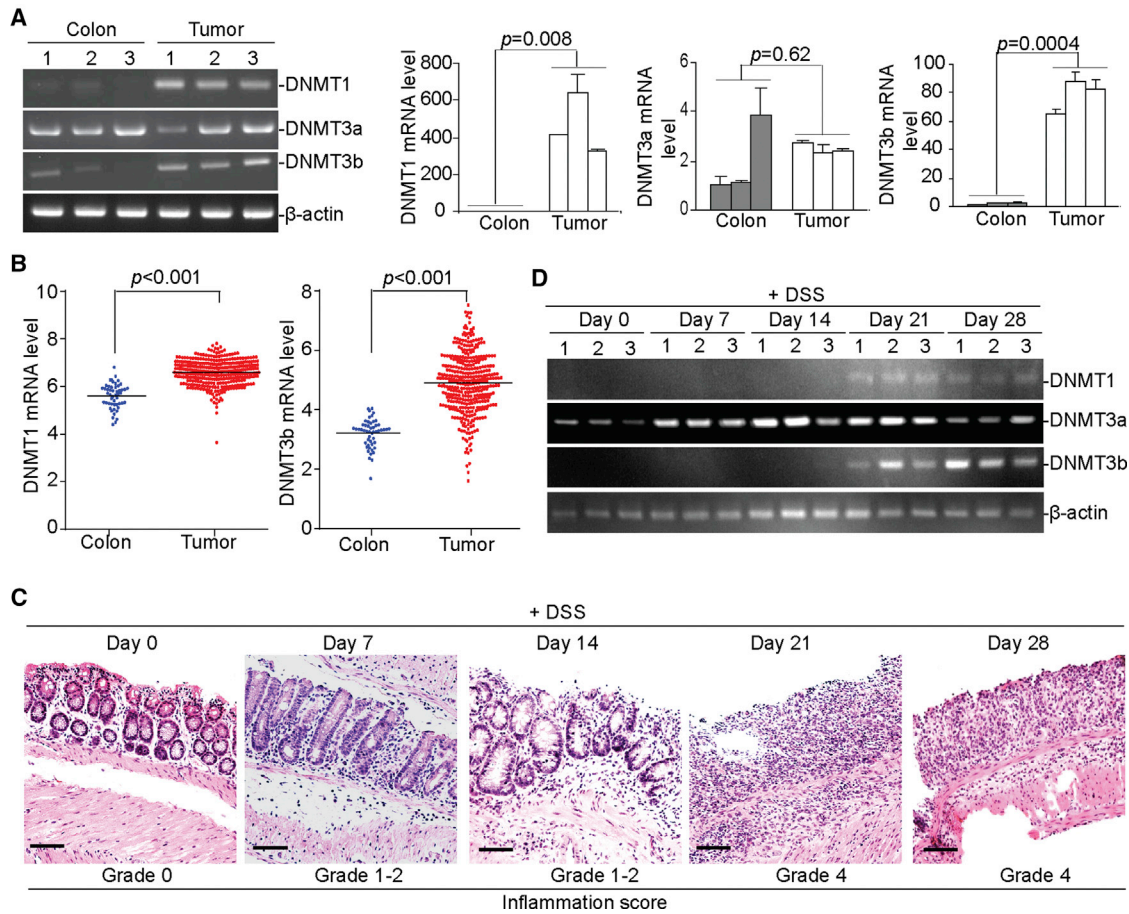

**Figure 4. Chronic Inflammation Upregulates DNMT1 and DNMT3b Expression in Colonic Epithelial Cells**

(A) RNA was isolated from colon tissues of tumor-free control mice (n = 3) and tumor tissues of AOM-DSS-treated mice (n = 3) and analyzed for the expression levels of DNMT1, DNMT3a, and DNMT3b by semiquantitative RT-PCR (left) and qPCR (right) using β-actin as an internal control. Each column represents the mean of triplicates from one mouse. Bar, SD. Three mice are included in each group.

(B) DNMT1 and DNMT3b mRNA expression datasets in normal human colon tissues (n = 51) and human colorectal carcinoma tissues (n = 380) were extracted from TCGA database and compared.

(C) WT C57BL/6 mice were treated with the 2% DSS-water cycle, as described in the STAR Methods. Colon tissues were collected at the indicated time points (n = 3) and sectioned and stained by H&E. The stained sections were analyzed for the inflammation scores based on the grades, as described in STAR Methods. Scale bar, 100 μm.

(D) RNA was extracted from the colon tissues of mice treated with the 2% DSS-water cycle, as described in STAR Methods at the indicated time points, and analyzed for *Dnmt1*, *Dnmt3a*, and *Dnmt3b* mRNA levels by RT-PCR.

## DISCUSSION

A molecular connection between proinflammatory pathways and CAC came from a study using a colitis mouse model with deficiency in nuclear factor κB (NF-κB) activation, and it was determined that NF-κB acts as an oncogene for CAC (Greten et al., 2004). IBD susceptibility genes such as NOD2 may suppress CAC through the inhibition of NF-κB activation (Udden et al., 2017). Here, we determined that the newly identified UC susceptibility gene IRF8 functions as a CAC suppressor, and chronic inflammation promotes CAC through silencing IRF8 expression by an epigenomic mechanism.

IRF8 expression is regulated by promoter methylation in a tissue-dependent manner. In osteoclast progenitors, thymidine phosphorylase activated the phosphoinositide 3-kinase (PI3K)/

Akt signaling pathway to increase the expression of DNMT3a, but not DNMT1 and DNMT3b, to hypermethylate the *Irf8* promoter (Liu et al., 2016). Consistent with the roles for DNMT1 and DNMT3b in genome-wide DNA methylation in human colon carcinoma cells (Rhee et al., 2002), we observed that the expression levels of DNMT1 and DNMT3b, but not DNMT3a, are upregulated in CAC as compared to normal colon tissues. Furthermore, DSS-induced chronic inflammation is sufficient to upregulate DNMT1 and DNMT3b and the *Irf8* promoter methylation in colonic epithelial cells. Aberrant DNA methylation of CpG islands has been widely observed in human colorectal carcinoma and is significantly associated with gene silencing through gene-specific mechanisms (Klett et al., 2018; Weisenberger et al., 2006). CpG island methylator phenotype-positive colorectal tumors represent a distinct

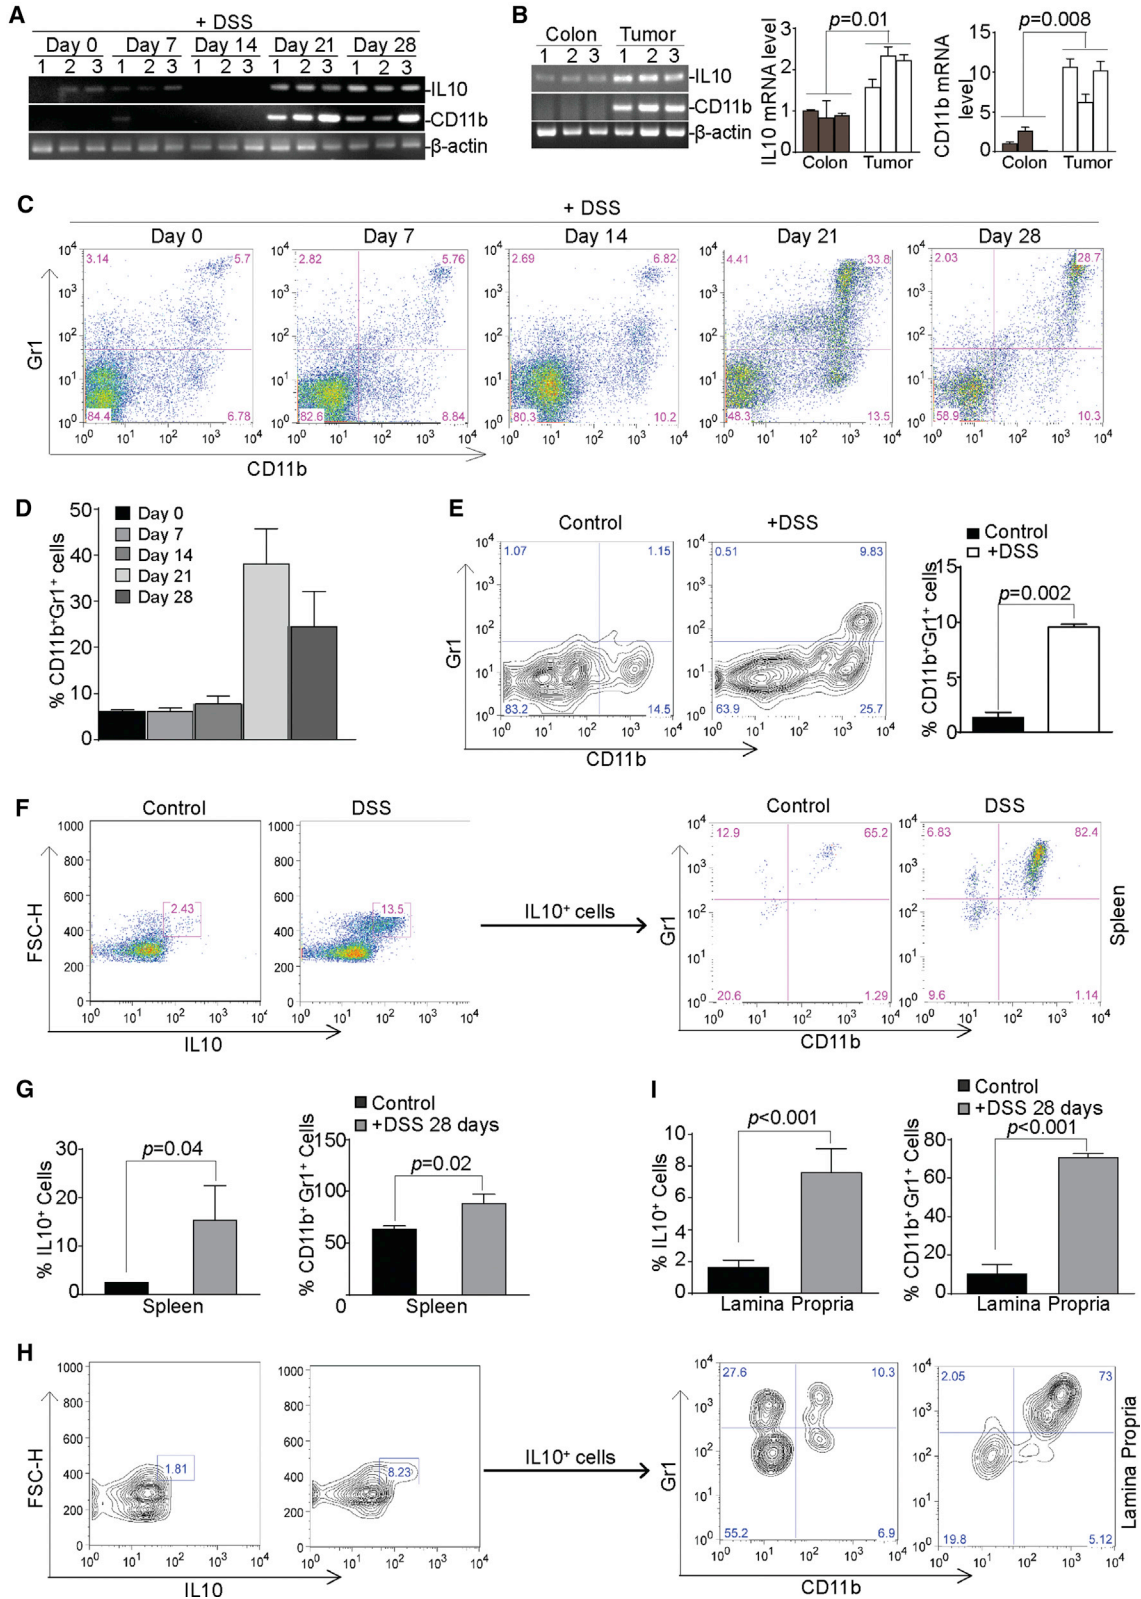

(legend on next page)



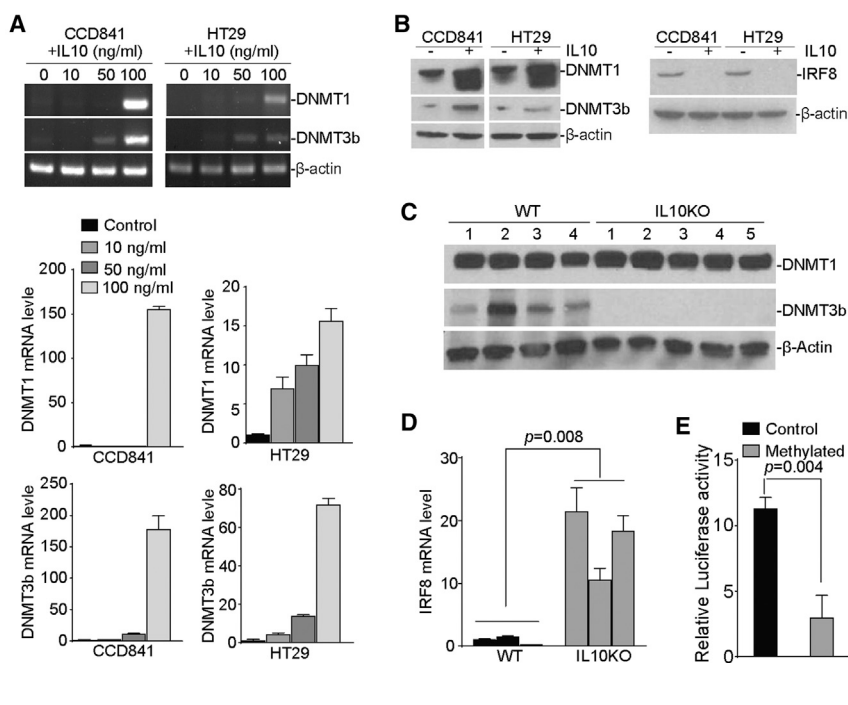

**Figure 6. IL-10 Upregulates DNMT1 and DNMT3b Expression in Colon Epithelial and Carcinoma Cells**

(A) Colonic epithelial CCD841 and colon carcinoma HT29 cells were treated with recombinant IL-10 at the indicated doses for 24 hr and analyzed for *DNMT1* and *DNMT3b* mRNA expression levels by semiquantitative RT-PCR (top) and qPCR (bottom) using  $\beta$ -actin as an internal control. Bar, SD.

(B) CCD841 and HT29 cells were treated with recombinant IL-10 (100 ng/mL) for 24 hr and analyzed by western blotting analysis of DNMT1, DNMT3b (left), and IRF8 (right) protein levels.

(C) WT ( $n = 4$ ) and IL-10 KO ( $n = 5$ ) mice were treated with the DSS-water cycle, as described in STAR Methods for 28 days. Colon tissues were collected and analyzed by western blotting for DNMT1 and DNMT3b protein levels.

(D) WT ( $n = 3$ ) and IL-10 KO ( $n = 3$ ) mice were treated with the 2% DSS-water cycle, as described in STAR Methods. Colon tissues were collected at day 28 and analyzed by qPCR for the IRF8 mRNA level with  $\beta$ -actin as an internal control. Bar, SD.

(E) The pGL3 vector containing the human *IRF8* promoter was treated with methylase *in vitro* and transfected to CCD841 cells overnight. Cells were lysated and analyzed for luciferase activity, as described in STAR Methods.

subset of colorectal tumors, including almost all cases of tumors with the BRAF mutation. Methylation of MLH1 often links to sporadic cases of colorectal tumor mismatch repair deficiency (Weisenberger et al., 2006). Therefore, DNA methylation is a key mechanism that colorectal tumors use to promote the disease. Our data point to a previously uncharacterized mechanism underlying the chronic colonic inflammation promotion of CAC: chronic inflammation induces the upregulation of DNMT1 and DNMT3b to hypermethylate the *irf8* promoter CpG island and silence the tumor suppressor gene *Irf8* in colonic epithelial cells.

Although IL-10 acts as an anti-inflammatory cytokine to suppress inflammation and CAC (Lee et al., 2016b; Moschen et al., 2016; Murata et al., 2015), GWAS has identified *IL10* as a susceptibility locus associated with IBD (Jostins et al., 2012). It is generally believed that IL-10 suppresses inflammation-mediated colorectal

cancer by inhibiting the production of proinflammatory cytokines, including IFN $\gamma$ , tumor necrosis factor  $\alpha$  (TNF- $\alpha$ ), IL-1 $\beta$ , IL-6, and IL-12 (Moore et al., 2001). Many of the proinflammatory cytokines are abundantly expressed in chronic inflammatory lesions and the tumor tissues, but it was reported that, unlike these proinflammatory cytokines, IL-10 is not expressed in tumor tissues (Mumm et al., 2011). It is well known that IL-10 is expressed in B and T cells (Dambuzza et al., 2017; Mion et al., 2017; Yu et al., 2013). IL-10 is also expressed in myeloid cells such as MDSCs (Hardbower et al., 2017; Shvedova et al., 2015) to promote tumor growth. MDSCs are induced by inflammatory factors that crosstalk with tumor cells in the tumor microenvironment to promote tumor growth through immunological and non-immunological mechanisms (Beury et al., 2014; Danelli et al., 2015a, 2015b; Kato et al., 2013). In this study, we observed that IL-10 is abundantly expressed in MDSCs in colon tissues and second lymphoid organs

**Figure 5. Chronic Inflammation Induces IL-10<sup>+</sup> MDSC Accumulation in Colon Lamina Propria**

(A) RNA was isolated from colon tissues from mice treated with DSS at days 0, 7, 14, 21, and 28 and analyzed for IL-10 and CD11b mRNA expression levels by RT-PCR.

(B) RNA was isolated from colon tissues from tumor-free control mice ( $n = 3$ ) and from tumor tissues of AOM/DSS-treated mice ( $n = 3$ ) and analyzed for the expression levels of IL-10 and CD11b by semiquantitative RT-PCR (left) and q-RT-PCR (right) using  $\beta$ -actin as an internal control. Each column represents the mean of triplicates of one mouse. Bar, SD.

(C) CD11b<sup>+</sup>Gr1<sup>+</sup> MDSC profiles in the spleen cells of mice at days 0, 7, 14, 21, and 28 after DSS treatment, as in (A). Shown are representative results from one of three mice.

(D) Quantitation of CD11b<sup>+</sup>Gr1<sup>+</sup>, as shown in (C). Bar, SD.

(E) CD11b<sup>+</sup>Gr1<sup>+</sup> MDSC levels in the lamina propria of colon tissues from control mice ( $n = 3$ ) and DSS-treated mice ( $n = 3$ ). Shown are representative results. The percentage of CD11b<sup>+</sup>Gr1<sup>+</sup> cells was quantified (right). Bar, SD.

(F) Spleen cells were stained with CD11b- and Gr1-specific antibodies, followed by intracellular staining with IL-10-specific antibody. The IL-10<sup>+</sup> cells were then gated and analyzed for CD11b<sup>+</sup>Gr1<sup>+</sup> cells. Shown are representative results from one of three mice.

(G) Quantification of the percentage of IL10<sup>+</sup> spleen cells (left) and the percentage of CD11b<sup>+</sup>Gr1<sup>+</sup> in the IL-10<sup>+</sup> spleen cells (right). Bar, SD.

(H) Lamina propria cells were extracted from colon tissues and stained with CD11b- and Gr1-specific antibodies, followed by intracellular staining with IL-10-specific antibody. The IL-10<sup>+</sup> cells were then gated and analyzed for CD11b<sup>+</sup>Gr1<sup>+</sup> cells. Shown are representative results from one of three mice.

(I) Quantification of the percentage of IL-10<sup>+</sup> lamina propria cells (left) and the percentage of CD11b<sup>+</sup>Gr1<sup>+</sup> in the IL-10<sup>+</sup> lamina propria cells (right). Bar, SD.

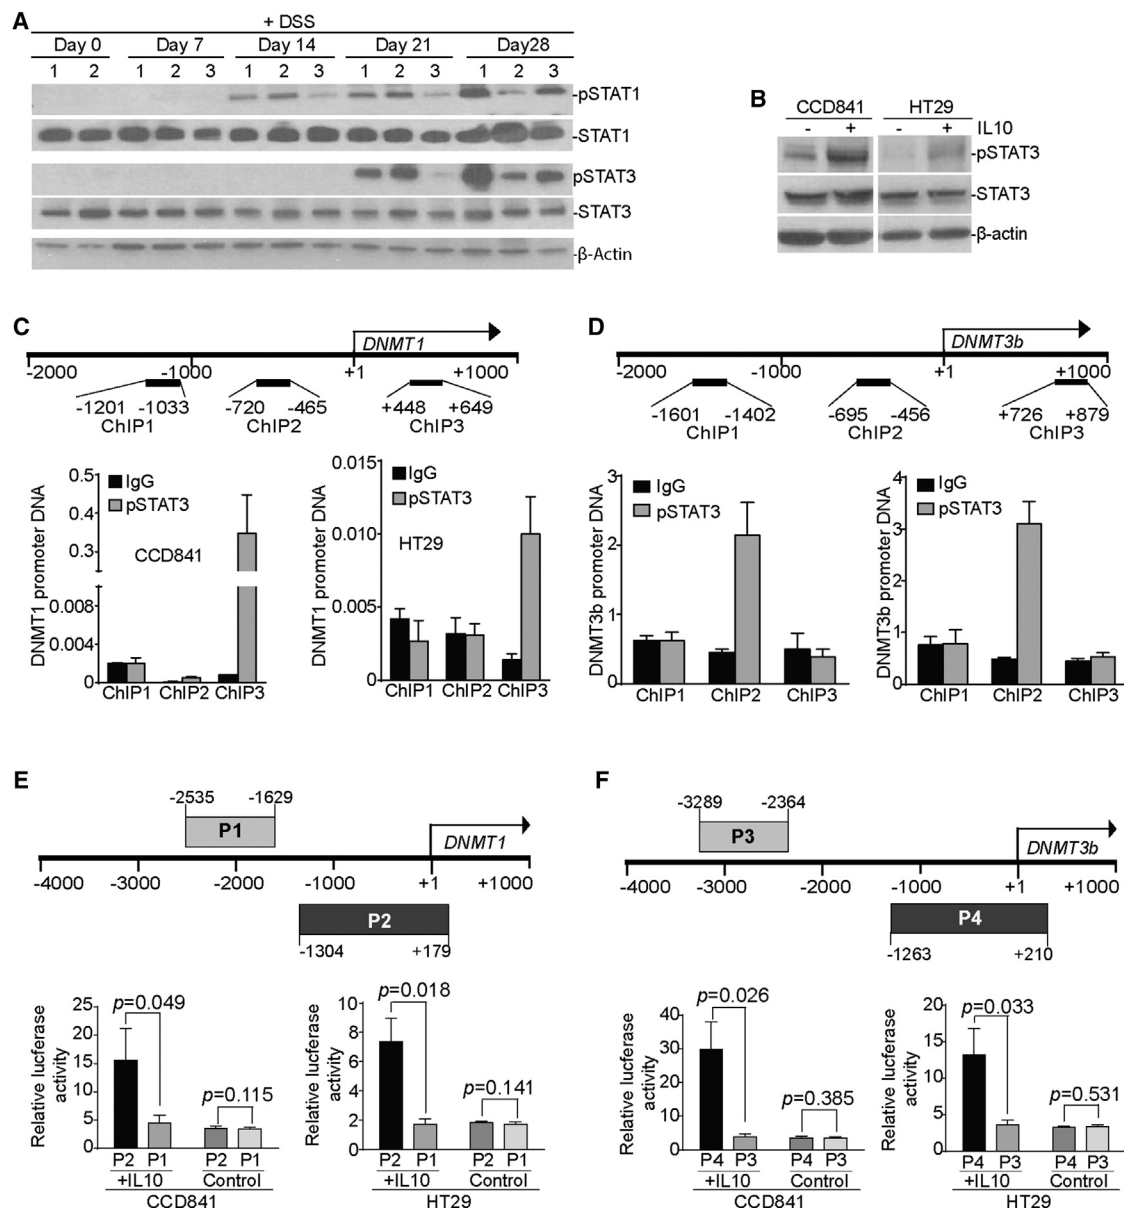

**Figure 7. IL-10 Induces the Activation of STAT3 that Binds to the *dnmt1* and *dnmt3b* Promoters in Colon Epithelial and Carcinoma Cells**

(A) WT C57BL/6 mice were treated with the 2% DSS-water cycle, as described in STAR Methods. Colon tissues were collected from mice at the indicated time points and analyzed by western blotting for STAT1 and STAT3 protein levels.  $\beta$ -Actin was used as a normalization control.

(B) CCD841 and HT29 cells were treated with recombinant IL-10 (100 ng/mL) for 2 hr and analyzed for the indicated proteins by western blotting.

(C) Top: structure of the *Dnmt1* promoter region. The number below the bar indicates nucleotide locations relative to the *Dnmt1* transcription initiation site. The ChIP PCR primer regions are indicated under the bar. Bottom: CCD841 and HT29 cells were stimulated with recombinant IL-10 protein (100 ng/mL) for 16 hr, then analyzed by ChIP using immunoglobulin G (IgG) control antibody and pSTAT3-specific antibody, respectively, followed by qPCR analysis with *Dnmt1* promoter DNA-specific PCR primers, as shown at top. Input DNA was used as a normalization control. The input of each ChIP primer set was arbitrarily set at 1, and the pSTAT3 was normalized to the input DNA level. Column, mean; bar, SD.

(D) Top: structure of the *Dnmt3b* promoter region. The number below the bar indicates nucleotide locations relative to the *Dnmt3b* transcription initiation site. The ChIP PCR primer regions are indicated under the bar. Bottom: CCD841 and HT29 cells were stimulated with recombinant IL-10 protein (100 ng/mL) for 16 hr, then analyzed by ChIP using IgG control antibody and pSTAT3-specific antibody, respectively, followed by qPCR analysis with *Dnmt3b* promoter DNA-specific PCR primers, as shown at top. Input DNA was used as a normalization control. The input of each ChIP primer set was arbitrarily set at 1, and the pSTAT3 was normalized to the input DNA level. Column, mean; bar, SD.

(E and F) The human *DNMT1* (E) and *DNMT3b* (F) promoter DNA fragments were amplified by PCR from the two indicated regions (top: P1 and P2 for *DNMT1*, and P3 and P4 for *DNMT3b*) and cloned to the pGL3 vector. pGL3 vectors containing the P1, P2, P3, or P4 DNA fragments were transiently transfected to CCD841 and HT29 cells, respectively, overnight. Cells were either untreated (control) or treated with IL-10 (100 ng/mL) for 4 hr. Cells were lysated and analyzed for luciferase activity. Bar, SD.

under conditions of chronic inflammation. We further demonstrated that IL-10 activates STAT3, which directly binds to the *Dnmt1* and *Dnmt3b* promoter regions to regulate DNMT1 and DNMT3b expression in colonic epithelial and colon carcinoma cells. The molecular link between IL-10 and DNMT3b is further validated by our observation in inflamed colon tissues that the deletion of IL-10 results in the loss of DNMT3b expression. Since it is known that IL-10 inhibits the IL-6-mediated STAT3 activation in MDSCs (Lee et al., 2016a), it is possible that IL-10 KO colon tissues express a high level of DNMT1 because IL-10 deficiency likely leads to increased IL-6 and resultant DNMT1 upregulation under conditions of chronic inflammation (Li et al., 2012). Therefore, in contrast to IL-10 functioning as a suppressor of CAC, our data indicate that IL-10 plays a promoting role in chronic inflammation-mediated CAC. These contrasting roles of IL-10 in CAC may be due to the timing and sequence of IL-10 activation and function. IL-10 is an inhibitor of NF- $\kappa$ B (Stayrook et al., 1997), and NF- $\kappa$ B is essential for CAC (Greten et al., 2004). Therefore, it is expected that chronic inflammation induces a higher and earlier incidence of colon tumors in *IL10* KO mice since loss of IL-10 function occurs before the start of inflammation. However, in the AOM-DSS WT mouse model, IL-10-producing MDSCs accumulate only at a late stage of inflammation, and therefore IL-10 inhibition of NF- $\kappa$ B activation may not be relevant for the initiation of NF- $\kappa$ B-dependent epithelial cell transformation. Instead, higher levels of IL-10 in the colon lamina propria activate the STAT3 pathway to promote tumor growth through DNMT3b-mediated IRF8 silencing. Evaluations of these contrasting roles of IL-10 in CAC require further study. Nevertheless, our data demonstrate that the MDSC-IL-10-STAT3-DNMT3b-IRF8 circuit represents another pathway linking chronic inflammation and CAC.

## STAR★METHODS

Detailed methods are provided in the online version of this paper and include the following:

- KEY RESOURCES TABLE
- CONTACT FOR REAGENT AND RESOURCE SHARING
- EXPERIMENTAL MODEL AND SUBJECT DETAILS
  - Mice
  - Cell lines
- METHOD DETAILS
  - AOM injection and DSS administration (colitis associated cancer mouse model)
  - Mouse body weight and mortality analysis
  - GFP fluorescence visualization
  - DNA methylation analysis
  - Flow cytometry
  - Lamina propria cells extraction and Intracellular staining
  - RT-PCR analysis
  - Western blot analysis
  - Chromatin Immunoprecipitation (ChIP)
  - Luciferase Reporter Assay
  - Immunohistochemistry
  - TCGA database analysis
- QUANTIFICATION AND STATISTICAL ANALYSIS

## SUPPLEMENTAL INFORMATION

Supplemental Information includes six figures and one table and can be found with this article online at <https://doi.org/10.1016/j.celrep.2018.11.050>.

## ACKNOWLEDGMENTS

We thank Dr. Kimya Jones at Georgia Esoteric Molecular Labs, LLC, for the excellent technical assistance in immunohistochemical staining of mouse colon tissues. Grant support came from the NIH, United States (CA133085, CA182518, and CA227433 to K.L.) and a Veterans Affairs Merit Review Award, United States (BX001962 to K.L.). This work was supported in part by the Intramural Research Program of the National Institute of Allergy and Infectious Diseases, United States (to H.C.M.).

## AUTHOR CONTRIBUTIONS

M.L.I., J.D.K., C.L., P.S.R., W.X., and D.Y. conducted the experiments. N.M.S. analyzed the data. M.L.I., H.C.M., and K.L. wrote the manuscript. D.D.B., P.J.B., H.C.M., and K.L. designed the studies.

## DECLARATION OF INTERESTS

The authors declare no competing interests.

Received: December 27, 2017

Revised: October 6, 2018

Accepted: November 12, 2018

Published: December 11, 2018

## REFERENCES

- Albregues, J., Bertero, T., Grasset, E., Bonan, S., Maiel, M., Bourget, I., Philippe, C., Herraiz Serrano, C., Benamar, S., Croce, O., et al. (2015). Epigenetic switch drives the conversion of fibroblasts into proinvasive cancer-associated fibroblasts. *Nat. Commun.* 6, 10204.
- Barrett, J.C., Hansoul, S., Nicolae, D.L., Cho, J.H., Duerr, R.H., Rioux, J.D., Brant, S.R., Silverberg, M.S., Taylor, K.D., Barnada, M.M., et al.; NIDDK IBD Genetics Consortium; Belgian-French IBD Consortium; Wellcome Trust Case Control Consortium (2008). Genome-wide association defines more than 30 distinct susceptibility loci for Crohn's disease. *Nat. Genet.* 40, 955–962.
- Beury, D.W., Parker, K.H., Nyandjo, M., Sinha, P., Carter, K.A., and Ostrand-Rosenberg, S. (2014). Cross-talk among myeloid-derived suppressor cells, macrophages, and tumor cells impacts the inflammatory milieu of solid tumors. *J. Leukoc. Biol.* 96, 1109–1118.
- Dambuza, I.M., He, C., Choi, J.K., Yu, C.R., Wang, R., Mattapallil, M.J., Wingfield, P.T., Caspi, R.R., and Egwuagu, C.E. (2017). IL-12p35 induces expansion of IL-10 and IL-35-expressing regulatory B cells and ameliorates autoimmune disease. *Nat. Commun.* 8, 719.
- Danelli, L., Frossi, B., Gri, G., Mion, F., Guarnotta, C., Bongiovanni, L., Tripodo, C., Mariuzzi, L., Marzinotto, S., Rigoni, A., et al. (2015a). Mast cells boost myeloid-derived suppressor cell activity and contribute to the development of tumor-favoring microenvironment. *Cancer Immunol. Res.* 3, 85–95.
- Danelli, L., Frossi, B., and Pucillo, C.E. (2015b). Mast cell/MDSC a liaison immunosuppressive for tumor microenvironment. *Oncolmmunology* 4, e1001232.
- Dennis, K.L., Saadalla, A., Blatner, N.R., Wang, S., Venkateswaran, V., Gounari, F., Cheroutre, H., Weaver, C.T., Roers, A., Egilmez, N.K., and Khazaie, K. (2015). T-cell expression of IL10 is essential for tumor immune surveillance in the small intestine. *Cancer Immunol. Res.* 3, 806–814.
- Elding, H., Lau, W., Swallow, D.M., and Maniatis, N. (2013). Refinement in localization and identification of gene regions associated with Crohn disease. *Am. J. Hum. Genet.* 92, 107–113.



- Feng, J., Wang, H., Shin, D.M., Masiuk, M., Qi, C.F., and Morse, H.C., 3rd. (2011). IFN regulatory factor 8 restricts the size of the marginal zone and follicular B cell pools. *J. Immunol.* *186*, 1458–1466.
- Gonzalez-Aparicio, M., Alzuguren, P., Mauleon, I., Medina-Echeverez, J., Herivas-Stubbs, S., Mancheno, U., Berraondo, P., Crettaz, J., Gonzalez-Asegui-nolaza, G., Prieto, J., and Hernandez-Alcoceba, R. (2011). Oxaliplatin in combination with liver-specific expression of interleukin 12 reduces the immunosuppressive microenvironment of tumours and eradicates metastatic colorectal cancer in mice. *Gut* *60*, 341–349.
- Greten, F.R., Eckmann, L., Greten, T.F., Park, J.M., Li, Z.W., Egan, L.J., Kagnoff, M.F., and Karin, M. (2004). IKKbeta links inflammation and tumorigenesis in a mouse model of colitis-associated cancer. *Cell* *118*, 285–296.
- Hardbower, D.M., Coburn, L.A., Asim, M., Singh, K., Sierra, J.C., Barry, D.P., Gobert, A.P., Piazuelo, M.B., Washington, M.K., and Wilson, K.T. (2017). EGFR-mediated macrophage activation promotes colitis-associated tumorigenesis. *Oncogene* *36*, 3807–3819.
- Holtschke, T., Löhler, J., Kanno, Y., Fehr, T., Giese, N., Rosenbauer, F., Lou, J., Knobloch, K.P., Gabriele, L., Waring, J.F., et al. (1996). Immunodeficiency and chronic myelogenous leukemia-like syndrome in mice with a targeted mutation of the ICSBP gene. *Cell* *87*, 307–317.
- Huang, W.Y., Hsu, S.D., Huang, H.Y., Sun, Y.M., Chou, C.H., Weng, S.L., and Huang, H.D. (2015). MethHC: a database of DNA methylation and gene expression in human cancer. *Nucleic Acids Res.* *43*, D856–D861.
- Jostins, L., Ripke, S., Weersma, R.K., Duerr, R.H., McGovern, D.P., Hui, K.Y., Lee, J.C., Schumm, L.P., Sharma, Y., Anderson, C.A., et al.; International IBD Genetics Consortium (IBDGC) (2012). Host-microbe interactions have shaped the genetic architecture of inflammatory bowel disease. *Nature* *491*, 119–124.
- Karki, R., Lee, E., Place, D., Samir, P., Mavuluri, J., Sharma, B.R., Balakrishnan, A., Malireddi, R.K.S., Geiger, R., Zhu, Q., et al. (2018). IRF8 regulates transcription of Naips for NLR4 inflammasome activation. *Cell* *173*, 920–933.e13.
- Katoh, H., Wang, D., Daikoku, T., Sun, H., Dey, S.K., and Dubois, R.N. (2013). CXCR2-expressing myeloid-derived suppressor cells are essential to promote colitis-associated tumorigenesis. *Cancer Cell* *24*, 631–644.
- Kim, S.H., Burton, J., Yu, C.R., Sun, L., He, C., Wang, H., Morse, H.C., 3rd, and Egwuagu, C.E. (2015). Dual function of the IRF8 transcription factor in autoimmune uveitis: loss of IRF8 in T cells exacerbates uveitis, whereas *Irf8* deletion in the retina confers protection. *J. Immunol.* *195*, 1480–1488.
- Klett, H., Balavarca, Y., Toth, R., Gigic, B., Habermann, N., Scherer, D., Schrotz-King, P., Ulrich, A., Schirmacher, P., Herpel, E., et al. (2018). Robust prediction of gene regulation in colorectal cancer tissues from DNA methylation profiles. *Epigenetics* *13*, 386–397.
- Lasry, A., Zinger, A., and Ben-Neriah, Y. (2016). Inflammatory networks underlying colorectal cancer. *Nat. Immunol.* *17*, 230–240.
- Lee, B.R., Kwon, B.E., Hong, E.H., Shim, A., Song, J.H., Kim, H.M., Chang, S.Y., Kim, Y.J., Kweon, M.N., Youn, J.I., and Ko, H.J. (2016a). Interleukin-10 attenuates tumour growth by inhibiting interleukin-6/signal transducer and activator of transcription 3 signalling in myeloid-derived suppressor cells. *Cancer Lett.* *381*, 156–164.
- Lee, J.J., Rothenberg, M.E., Seeley, E.S., Zimdahl, B., Kawano, S., Lu, W.J., Shin, K., Sakata-Kato, T., Chen, J.K., Diehn, M., et al. (2016b). Control of inflammation by stromal Hedgehog pathway activation restrains colitis. *Proc. Natl. Acad. Sci. USA* *113*, E7545–E7553.
- Li, Y., Deuring, J., Peppelenbosch, M.P., Kuipers, E.J., de Haar, C., and van der Woude, C.J. (2012). IL-6-induced DNMT1 activity mediates SOCS3 promoter hypermethylation in ulcerative colitis-related colorectal cancer. *Carcinogenesis* *33*, 1889–1896.
- Liu, H., Liu, Z., Du, J., He, J., Lin, P., Amini, B., Starbuck, M.W., Novane, N., Shah, J.J., Davis, R.E., et al. (2016). Thymidine phosphorylase exerts complex effects on bone resorption and formation in myeloma. *Sci. Transl. Med.* *8*, 353ra113.
- McGough, J.M., Yang, D., Huang, S., Georgi, D., Hewitt, S.M., Röcken, C., Tänzer, M., Ebert, M.P., and Liu, K. (2008). DNA methylation represses IFN-gamma-induced and signal transducer and activator of transcription 1-mediated IFN regulatory factor 8 activation in colon carcinoma cells. *Mol. Cancer Res.* *6*, 1841–1851.
- Mion, F., Vetrano, S., Tonon, S., Valeri, V., Piontini, A., Burocchi, A., Petti, L., Frossi, B., Gulino, A., Tripodo, C., et al. (2017). Reciprocal influence of B cells and tumor macro and microenvironments in the *Apc<sup>Min/+</sup>* model of colorectal cancer. *Oncol Immunology* *6*, e1336593.
- Moore, K.W., de Waal Malefyt, R., Coffman, R.L., and O’Garra, A. (2001). Interleukin-10 and the interleukin-10 receptor. *Annu. Rev. Immunol.* *19*, 683–765.
- Moschen, A.R., Gerner, R.R., Wang, J., Klepsch, V., Adolph, T.E., Reider, S.J., Hackl, H., Pfister, A., Schilling, J., Moser, P.L., et al. (2016). Lipocalin 2 protects from inflammation and tumorigenesis associated with gut microbiota alterations. *Cell Host Microbe* *19*, 455–469.
- Mumm, J.B., Emmerich, J., Zhang, X., Chan, I., Wu, L., Mauze, S., Blaisdell, S., Basham, B., Dai, J., Grein, J., et al. (2011). IL-10 elicits IFN $\gamma$ -dependent tumor immune surveillance. *Cancer Cell* *20*, 781–796.
- Murata, Y., Kotani, T., Supriatna, Y., Kitamura, Y., Imada, S., Kawahara, K., Nishio, M., Daniwijaya, E.W., Sadakata, H., Kusakari, S., et al. (2015). Protein tyrosine phosphatase SAP-1 protects against colitis through regulation of CEACAM20 in the intestinal epithelium. *Proc. Natl. Acad. Sci. USA* *112*, E4264–E4271.
- Oft, M. (2014). IL-10: master switch from tumor-promoting inflammation to antitumor immunity. *Cancer Immunol. Res.* *2*, 194–199.
- Rhee, I., Bachman, K.E., Park, B.H., Jair, K.W., Yen, R.W., Schuebel, K.E., Cui, H., Feinberg, A.P., Lengauer, C., Kinzler, K.W., et al. (2002). DNMT1 and DNMT3b cooperate to silence genes in human cancer cells. *Nature* *416*, 552–556.
- Ruffell, B., Chang-Strachan, D., Chan, V., Rosenbusch, A., Ho, C.M., Pryer, N., Daniel, D., Hwang, E.S., Rugo, H.S., and Coussens, L.M. (2014). Macrophage IL-10 blocks CD8+ T cell-dependent responses to chemotherapy by suppressing IL-12 expression in intratumoral dendritic cells. *Cancer Cell* *26*, 623–637.
- Shvedova, A.A., Kisin, E.R., Yanamala, N., Tkach, A.V., Gutkin, D.W., Star, A., Shurin, G.V., Kagan, V.E., and Shurin, M.R. (2015). MDSC and TGF $\beta$  are required for facilitation of tumor growth in the lungs of mice exposed to carbon nanotubes. *Cancer Res.* *75*, 1615–1623.
- Stayrook, K.R., McKinzie, J.H., Burke, Y.D., Burke, Y.A., and Crowell, P.L. (1997). Induction of the apoptosis-promoting protein Bak by perillyl alcohol in pancreatic ductal adenocarcinoma relative to untransformed ductal epithelial cells. *Carcinogenesis* *18*, 1655–1658.
- Tanikawa, T., Wilke, C.M., Kryczek, I., Chen, G.Y., Kao, J., Núñez, G., and Zou, W. (2012). Interleukin-10 ablation promotes tumor development, growth, and metastasis. *Cancer Res.* *72*, 420–429.
- Udden, S.M.N., Peng, L., Gan, J.L., Shelton, J.M., Malter, J.S., Hooper, L.V., and Zaki, M.H. (2017). NOD2 suppresses colorectal tumorigenesis via down-regulation of the TLR pathways. *Cell Rep.* *19*, 2756–2770.
- Wang, H., Yan, M., Sun, J., Jain, S., Yoshimi, R., Abolfath, S.M., Ozato, K., Coleman, W.G., Jr., Ng, A.P., Metcalf, D., et al. (2014). A reporter mouse reveals lineage-specific and heterogeneous expression of IRF8 during lymphoid and myeloid cell differentiation. *J. Immunol.* *193*, 1766–1777.
- Weisenberger, D.J., Siegmund, K.D., Campan, M., Young, J., Long, T.I., Faasse, M.A., Kang, G.H., Widschwendter, M., Weener, D., Buchanan, D., et al. (2006). CpG island methylator phenotype underlies sporadic microsatellite instability and is tightly associated with BRAF mutation in colorectal cancer. *Nat. Genet.* *38*, 787–793.
- Yan, M., Wang, H., Sun, J., Liao, W., Li, P., Zhu, Y., Xu, C., Joo, J., Sun, Y., Ab-basi, S., et al. (2016). Cutting edge: expression of IRF8 in gastric epithelial cells confers protective innate immunity against *Helicobacter pylori* infection. *J. Immunol.* *196*, 1999–2003.
- Yu, C.R., Dambuzza, I.M., Lee, Y.J., Frank, G.M., and Egwuagu, C.E. (2013). STAT3 regulates proliferation and survival of CD8+ T cells: enhances effector responses to HSV-1 infection, and inhibits IL-10+ regulatory CD8+ T cells in autoimmune uveitis. *Mediators Inflamm.* *2013*, 359674.

## STAR★METHODS

### KEY RESOURCES TABLE

| REAGENT or RESOURCE                                            | SOURCE                    | IDENTIFIER                        |
|----------------------------------------------------------------|---------------------------|-----------------------------------|
| <b>Antibodies</b>                                              |                           |                                   |
| Rabbit monoclonal anti-Irf8                                    | Cell Signaling Technology | Cat# 5628; RRID: AB_10828231      |
| Mouse monoclonal anti-Stat1 (pY701)                            | BD Biosciences            | Cat# 612133; RRID: AB_399504      |
| Mouse monoclonal anti-Stat1                                    | BD Biosciences            | Cat# 610186; RRID: AB_397585      |
| Mouse monoclonal anti-Stat3 (pY705)                            | BD Biosciences            | Cat# 612357; RRID: AB_399646      |
| Mouse monoclonal anti-Stat3                                    | BD Biosciences            | Cat# 610190; RRID: AB_397589      |
| Mouse monoclonal anti-Dnmt1[60B1220.1]-ChIP Grade              | Abcam                     | Cat# ab13537; RRID: AB_300438     |
| Mouse monoclonal anti-Dnmt3b[52A1018]-ChIP Grade               | Abcam                     | Cat# ab13604; RRID: AB_300494     |
| Mouse monoclonal anti- beta-Actin [Clone AC-74]                | Sigma-Aldrich             | Cat# A2228; RRID: AB_476697       |
| Rat monoclonal FITC anti-mouse CD8a[Clone 53-6.7]              | BioLegend                 | Cat# 100706; RRID: AB_312745      |
| Rat monoclonal PE anti-mouse CD4[Clone RM4-5]                  | BioLegend                 | Cat# 100512; RRID: AB_312715      |
| Rat monoclonal FITC anti-mouse/human CD11b[Clone M1/70]        | BioLegend                 | Cat# 101206; RRID: AB_312789      |
| Rat monoclonal PE anti-mouse Ly-6G/Ly-6C (Gr-1)[Clone RB6-8C5] | BioLegend                 | Cat# 108408; RRID: AB_313373      |
| Rat monoclonal APC anti-mouse IL10[Clone JES5-16E3]            | BioLegend                 | Cat# 505009; RRID: AB_315363      |
| Rabbit polyclonal anti-ki67                                    | Novus                     | Cat# NB500-170; RRID: AB_10001977 |
| Horse Anti-mouse IgG, HRP-linked                               | Cell Signaling Technology | Cat# 7076; RRID: AB_330924        |
| Goat Anti-rabbit IgG, HRP-linked                               | Cell Signaling Technology | Cat# 7074; RRID: AB_2099233       |
| InVivo monoclonal anti-mouse/human CD11b [clone M1/70]         | BioCell                   | Cat# BE0007; RRID: AB_1107582     |
| Rabbit monoclonal anti-Phospho-Stat3 (Ser727) (D4X3C)          | Cell Signaling Technology | Cat# 34911; RRID: AB_2737598      |
| normal rabbit IgG-AC                                           | Santa Cruz Biotechnology  | Cat# sc-2345; RRID: AB_737183     |
| <b>Chemicals, Peptides, and Recombinant Proteins</b>           |                           |                                   |
| Dextran sulfate sodium (colitis grade)                         | MP Biomedicals            | 0216011050                        |
| Azoxymethane                                                   | Sigma-Aldrich             | A5486                             |
| Recombinant Human IL-10 (carrier-free)                         | BioLegend                 | 571002                            |
| Recombinant Human IL-6 (carrier-free)                          | BioLegend                 | 570802                            |
| Recombinant Human IL-22 (carrier-free)                         | BioLegend                 | 571302                            |
| Recombinant Human IFN-gamma                                    | R&D Systems               | 285-IF-CF                         |
| Beetle Luciferin, Potassium Salt                               | Promega                   | E1601                             |
| TRIZOL Reagent                                                 | Invitrogen                | 15596018                          |
| Hydrogen peroxide solution                                     | Sigma-Aldrich             | 216763                            |
| VectaMount Permanent Mounting Medium                           | Vector Laboratories       | H-5000                            |
| Hematoxylin Solution, Harris Modified                          | Sigma-Aldrich             | HHS16                             |
| VECTOR Methyl Green                                            | Vector Laboratories       | H-3402                            |
| Lipofectamine 2000 Transfection Reagent                        | Invitrogen                | 11668019                          |
| Opti-MEM Reduced Serum Medium, GlutaMAX Supplement             | Invitrogen                | 51985034                          |
| HyClone Fetal Bovine Serum                                     | ThermoFisher              | SH3039603                         |
| issue-Tek <sup>®</sup> O.C.T. Compound                         | Sakura                    | 4583                              |
| Isopropanol, Molecular Biology Grade                           | ThermoFisher              | BP2618500                         |
| 1-Butanol, anhydrous, 99.8%                                    | Sigma-Aldrich             | 281549                            |
| Xylenes, histological grade                                    | Sigma-Aldrich             | 534056                            |

(Continued on next page)

**Continued**

| REAGENT or RESOURCE                                                                       | SOURCE              | IDENTIFIER  |
|-------------------------------------------------------------------------------------------|---------------------|-------------|
| Chloroform                                                                                | Sigma-Aldrich       | C2432       |
| Blotting-Grade Blocker                                                                    | Bio-Rad             | 1706404     |
| Antigen Unmasking Solution, Citrate Based                                                 | Vector Laboratories | H-3300      |
| ImmPACT DAB Peroxidase (HRP) Substrate                                                    | Vector Laboratories | SK-4105     |
| S.O.C. Medium                                                                             | Invitrogen          | 15544034    |
| Paraformaldehyde, 96%                                                                     | ACROS Organics      | 416785000   |
| Sucrose, 99+%                                                                             | Sigma-Aldrich       | S0389       |
| Formalin, 10% (Phosphate Buffer).                                                         | ThermoFisher        | SF100-4     |
| Universal-Agarose, peqGOLD                                                                | Peqlab              | 351020      |
| 3M Sodium Acetate, pH 5.2 ± 0.1                                                           | Corning             | 46-033-CI   |
| EDTA (0.5 M), pH 8.0                                                                      | Invitrogen          | 15575038    |
| Formaldehyde                                                                              | ThermoFisher        | BP531       |
| Protein A Agarose/Salmon Sperm DNA                                                        | Millipore           | 16-157      |
| BioMag <sup>®</sup> Goat anti-Rat IgG                                                     | PolySciences        | 84330       |
| Phenol:Chloroform:Isoamyl Alcohol                                                         | Sigma-Aldrich       | P2069       |
| Corning <sup>®</sup> Trypsin EDTA 1X                                                      | Corning             | 25-052-CI   |
| VECTASHIELD Antifade Mounting Medium with DAPI                                            | Vector Laboratories | H-1200      |
| DNase I, RNase-free                                                                       | ThermoFisher        | EN0521      |
| Collagenase from Clostridium histolyticum                                                 | Sigma-Aldrich       | C0130       |
| Hyaluronidase from bovine testes                                                          | Sigma-Aldrich       | H3506       |
| Platinum II Taq Hot-Start DNA Polymerase                                                  | Invitrogen          | 14966001    |
| CpG Methyltransferase (M.SssI)                                                            | New England Biolabs | M0226S      |
| M-MLV Reverse Transcriptase                                                               | Promega             | M170A       |
| Taq DNA Polymerase                                                                        | GenScript           | E00007      |
| FastDigest KpnI                                                                           | Fermentas           | FD0524      |
| FastDigest HindIII                                                                        | Fermentas           | FD0505      |
| FastDigest XhoI                                                                           | Fermentas           | FD0694      |
| X-Gal                                                                                     | Sigma-Aldrich       | 3117073001  |
| Corning 10% SDS                                                                           | Corning             | MT-46040-CI |
| Yeast tRNA                                                                                | ThermoFisher        | AM7119      |
| Corning <sup>®</sup> 500 mL RPMI 1640                                                     | Corning             | 10-040-CV   |
| HEPES Buffer                                                                              | Corning             | MT-25060-CI |
| Corning <sup>®</sup> 100 mL Penicillin-Streptomycin Solution, 100x                        | Corning             | 30-002-CI   |
| Sodium Pyruvate (100 mM)                                                                  | GIBCO               | 11360070    |
| MEM Non-Essential Amino Acids Solution (100X)                                             | HyClone             | SH3023801   |
| <b>Critical Commercial Assays</b>                                                         |                     |             |
| ImmPRESS HRP Universal Antibody (Anti-Mouse IgG/Anti-Rabbit IgG)                          | Vector Laboratories | MP-7500     |
| Mini-PROTEAN <sup>®</sup> TGX Gels                                                        | Bio-Rad             | 4561096     |
| Power SYBR Green PCR Master Mix                                                           | ThermoFisher        | 4367659     |
| Chromatin Immunoprecipitation (ChIP) Assay Kit                                            | Millipore           | 17295       |
| TA Cloning Kit, with pCR2.1 Vector and One Shot TOP10 Chemically Competent <i>E. coli</i> | Invitrogen          | K204001     |
| ApopTag <sup>®</sup> Plus Peroxidase <i>In Situ</i> Apoptosis Kit                         | Millipore           | S7101       |
| CpGenome Universal DNA Modification Kit                                                   | Millipore           | S7820       |
| QIAEX II Gel Extraction Kit                                                               | QIAGEN              | 20021       |
| Fixation/Permeabilization Solution Kit with BD GolgiPlug                                  | BD Biosciences      | 555028      |

(Continued on next page)



| <b>Continued</b>                                                  |                                                               |                                                                                                                               |
|-------------------------------------------------------------------|---------------------------------------------------------------|-------------------------------------------------------------------------------------------------------------------------------|
| REAGENT or RESOURCE                                               | SOURCE                                                        | IDENTIFIER                                                                                                                    |
| Zyppy Plasmid Miniprep Kit                                        | Zymo Research                                                 | D4019                                                                                                                         |
| Quick-DNA Miniprep Plus Kit                                       | Zymo Research                                                 | D4069                                                                                                                         |
| Western Lightning Plus-ECL, Enhanced Chemiluminescence Substrate  | PerkinElmer                                                   | NEL105001EA                                                                                                                   |
| Experimental Models: Cell Lines                                   |                                                               |                                                                                                                               |
| Cell Line: CCD 841 CoN (ATCC® CRL-1790)                           | American Type Culture Collection                              | <a href="https://www.atcc.org/Products/All/CRL-1790.aspx">https://www.atcc.org/Products/All/CRL-1790.aspx</a>                 |
| Cell Line: HT-29 (ATCC® HTB-38)                                   | American Type Culture Collection                              | <a href="https://atcc.org/Products/All/HTB-38.aspx">https://atcc.org/Products/All/HTB-38.aspx</a>                             |
| Cell Line: HCT 116 (ATCC® CCL-247)                                | American Type Culture Collection                              | <a href="https://www.atcc.org/products/all/CCL-247.aspx">https://www.atcc.org/products/all/CCL-247.aspx</a>                   |
| Cell Line: RAW 264.7 (ATCC® TIB-71)                               | American Type Culture Collection                              | <a href="https://www.atcc.org/Products/All/TIB-71.aspx">https://www.atcc.org/Products/All/TIB-71.aspx</a>                     |
| Cell Line: HCT116DNMT1 <sup>-/-</sup>                             | Dr. Bert Vogelstein (Johns Hopkins University, Baltimore, MD) | Rhee et al., 2002                                                                                                             |
| Cell Line: HCT116DNMT3b <sup>-/-</sup>                            | Dr. Bert Vogelstein (Johns Hopkins University, Baltimore, MD) | Rhee et al., 2002                                                                                                             |
| Cell Line: HCT116DNMT1 <sup>-/-</sup> DNMT3b <sup>-/-</sup> (DKO) | Dr. Bert Vogelstein (Johns Hopkins University, Baltimore, MD) | Rhee et al., 2002                                                                                                             |
| Experimental Models: Organisms/Strains                            |                                                               |                                                                                                                               |
| Mouse: B6(Cg)-Irf8 <sup>tm1.1Hm/J</sup>                           | Jackson Laboratory                                            | <a href="https://www.jax.org/strain/014175">https://www.jax.org/strain/014175</a>                                             |
| Mouse: B6.Cg-Tg(Vil1-cre)1000Gum/J                                | Jackson Laboratory                                            | <a href="https://www.jax.org/strain/021504">https://www.jax.org/strain/021504</a>                                             |
| Mouse: B6.129P2-Il10 <sup>tm1Cgn/J</sup>                          | Jackson Laboratory                                            | <a href="https://www.jax.org/strain/002251">https://www.jax.org/strain/002251</a>                                             |
| Mouse: B6(Cg)-Irf8 <sup>tm2.1Hm/J</sup>                           | Jackson Laboratory                                            | <a href="https://www.jax.org/strain/027084">https://www.jax.org/strain/027084</a>                                             |
| Mouse: Irf8KO Mice                                                | Dr. Keiko Ozato – (NIH, Bethesda, MD)                         | Holtschke et al., 1996                                                                                                        |
| Mouse: JAX C57BL/6J Mice                                          | Charles River                                                 | <a href="https://www.jax.org/strain/000664">https://www.jax.org/strain/000664</a>                                             |
| Oligonucleotides                                                  |                                                               |                                                                                                                               |
| All Primers, see Table S1                                         | This paper                                                    | N/A                                                                                                                           |
| Recombinant DNA                                                   |                                                               |                                                                                                                               |
| pGL3 Luciferase Reporter Vector (Basic)                           | Promega                                                       | E1751                                                                                                                         |
| Software and Algorithms                                           |                                                               |                                                                                                                               |
| MethHC                                                            | <a href="#">Huang et al., 2015</a>                            | <a href="https://academic.oup.com/nar/article/43/D1/D856/2438401">https://academic.oup.com/nar/article/43/D1/D856/2438401</a> |
| UCSC Xena Browser                                                 | University of California Santa Cruz                           | <a href="https://xenabrowser.net/heatmap/">https://xenabrowser.net/heatmap/</a>                                               |

## CONTACT FOR REAGENT AND RESOURCE SHARING

Further information and requests for resources and reagents should be directed to and will be fulfilled by the Lead Contact, Kebin Liu ([Kliu@augusta.edu](mailto:Kliu@augusta.edu)).

## EXPERIMENTAL MODEL AND SUBJECT DETAILS

### Mice

C57BL/6J, *loxP*-flanked *Irf8* [B6(Cg)-*Irf8*<sup>tm1.1Hm/J</sup>], villin-cre [B6.Cg-Tg(*Vil1-cre*)1000Gum/J], *Il10*KO mice [B6.129P2-*Il10*<sup>tm1Cgn/J</sup>], and IRF8-GFP reporter mice [B6(Cg)-*Irf8*<sup>tm2.1Hm/J</sup>] were obtained from the Jackson Laboratory (Bar Harbor, ME). Mice with a conditional IRF8 knock out were created by crossing the *loxP*-flanked *Irf8* mouse with the villin-cre mouse. IRF8KO mice were kindly provided by Dr. Keiko Ozato (National Institutes of Health, Bethesda, MD). All mice used in this study were aged between 2-3 months old at the start of the experiment, fed *ad libitum*, and maintained on a 12-hour light/dark cycle at the animal facility of Augusta University. All animal studies are approved in advance by Augusta University Institutional Animal Care and Use Committee (Protocol# 2008-0162).

### Cell lines

The human colon epithelial cell line CCD841 and human colon carcinoma HT29 and HCT116 cell lines were obtained from American Type Culture (Manassas, VA). HCT116DNMT1<sup>-/-</sup>, HCT116DNMT3b<sup>-/-</sup>, and HCT116DNMT1<sup>-/-</sup> DNMT3b<sup>-/-</sup> (DKO) were kindly provided by Dr. Bert Vogelstein (Johns Hopkins University, Baltimore, MD). CCD841 and HT29 Cells were treated with recombinant IL10, IL6 or IL22 (Biolegend, San Deigo, CA), or recombinant IFN $\gamma$  (R&D, Minneapolis, MN) for 2 or 24 h and analyzed by western blotting or/and RT-PCR.

## METHOD DETAILS

### AOM injection and DSS administration (colitis associated cancer mouse model)

Mice were injected with azoxymethane (AOM, Sigma-Aldrich, 10 mg/kg body weight) intraperitoneally once, followed by administration of 2% dextran sulfate sodium (DSS, MP Biomedicals, Santa Ana, CA) through the drinking water one day later for one week. DSS was replaced with water for two weeks. The DSS/water cycle was repeated two more times. Mice were maintained with regular drinking water for one more week after the 3<sup>rd</sup> cycle and then sacrificed for analysis. Colon tissues were dissected from the mice, flushed and cleaned with PBS, cut open longitudinally to examine tumor nodules. Both male and female mice were used in all AOM-DSS model experiments. DSS-model experiments were conducted on male mice.

### Mouse body weight and mortality analysis

Mice were weight at the start day of the above AOM-DSS treatment procedure and weighed every two days. The survival percentage of mice throughout the AOM/DSS treatment procedures was assessed from day 0 (AOM injected) to days 70 (day of scarification). For DSS-induced colitis mouse model, Mice were administered 2% dextran sulfate sodium through the drinking water for one week, followed by two weeks with regular water then one more week of 2% DSS drinking water.

### GFP fluorescence visualization

Colon tissues were dissected from sacrificed mice, flushed and cleaned with PBS, and cut open longitudinally. The tissues were then fixed in 4% paraformaldehyde (ACROS organic, Waltham, MA) for 24 hr, washed with PBS, incubated in 20% sucrose in PBS for another 24 hr. Tissues were then flash-frozen in optimal cutting temperature compound (OCT-Sakura, Torrance, CA) in dried ice-chilled 100% ethanol. The frozen tissue blocks were stored in  $-80^{\circ}\text{C}$  until use. Six  $\mu\text{m}$ -thick frozen sections were cut with a cryostat and allowed to dry overnight at room temperature. Sections were then washed with PBS, rinse briefly with water, and then mounted with VECTASHIELD mounting medium containing anti-fading agents with DAPI (Vector laboratories, Burlingame, CA). The tissues were examined under a LSM780 Meta confocal laser microscope (Carl Zeiss, Germany). The captured images were viewed and analyzed using Zeiss Zen Meta imaging 2012 software. Scale bar was calculated with ZEN software then extrapolated to all images with the same magnification power.

### DNA methylation analysis

Genomic DNA was extracted from colon tissues, colon tumor and colon carcinoma cell lines using Quick-DNA Miniprep Plus Kit (Zymo Research, Irvine, CA). Sodium bisulfite modification of the genomic DNA was carried out using CpGenome Universal DNA Modification Kit (Millipore, Burlington, MA) according to manufacture instructions. The bisulfite modified genomic DNA was used as a template for PCR amplification of *IRF8* promoter region using Platinum II Taq Hot-Start DNA Polymerase (Invitrogen, Carlsbad, CA) with bisulfite PCR primer pairs designed by MethPrimer program. The PCR amplicon was then cloned to pCR2.1 vector using TA cloning kit (Invitrogen, San Deigo, CA), transformed into One Shot TOP10 Chemically Competent *E. coli* cells (Invitrogen, Carlsbad, CA). Single colonies were grown in 5 mL LB medium and plasmid DNA was purified with Zyppy Plasmid Miniprep Kit (Zymo Research, Irvine, CA). Purified plasmid DNA from individual clones were then sent to Genewiz (South Plainfield, NJ) for sequencing. The methylation status of cytosine was analyzed using Quma program. Methyl-specific (MS-PCR) was carried out on the bisulfite modified genomic DNA using MS-PCR primers designed by MethPrimer program for methylated and unmethylated *irf8* promoter. All primer sequences are listed in [Table S1](#).

### Flow cytometry

Single cells were prepared from spleens and stained with the following fluorescent dye-conjugated antibodies: FITC-CD11b, PE-Gr1, PE-CD4 and FITC-CD8 (Biolegend, San Deigo, CA). The stained cells were analyzed in a LSR Fortessa (BD Biosciences, San Jose, CA).

### Lamina propria cells extraction and Intracellular staining

Colon tissue were dissected from mice, flushed and cleaned with PBS, cut open longitudinally, cut into small pieces and agitated in 1 mM EDTA at 37 $^{\circ}\text{C}$  for 30 min. Epithelial cells were filtered away through a 100  $\mu\text{M}$  cell strainer. Colon fragments were then washed with PBS, minced and digested in collagenase/hyaluronidase/DNase mixture at 37 $^{\circ}\text{C}$  for 45 min with agitation. The digests were then homogenized, filtered through 100  $\mu\text{m}$  cell strainer. The flow through was then centrifuged at  $> 300\text{ g}$  for 10 min and the cells were resuspended in PBS. Cells were first stained with FITC-CD11b- and PE-Gr1-specific antibodies, then fixed and permeabilized with

Fixation/Permeabilization Solution Kit (BD Biosciences, San Jose, CA), followed by staining with APC-anti-mouse IL10 antibody (Biolegend, San Diego, CA). The stained cells were analyzed in a FACS Calibur (BD Biosciences, San Jose, CA) or LSR Fortessa (BD Biosciences, San Jose, CA).

### RT-PCR analysis

Total RNA was isolated from cells or tissue using Trizol (Invitrogen, San Diego, CA) according to the manufacturer's instructions, and used for the first strand cDNA synthesis using the MMLV reverse transcriptase (Promega, Madison, WI). The cDNA was then used as template for semiquantitative or real-time PCR analysis with Power SYBR Green PCR Master Mix (ThermoFisher, Waltham, MA) using the StepOne Plus Real Time PCR System (Applied Biosystems, Foster City, CA). The sequences of primers are listed in [Table S1](#).

### Western blot analysis

Colon tissues and tumors were collected and homogenized into single cell suspension in PBS using an electric homogenizer. Subsequently, cells were lysed in total cell lysis buffer (20 mM HEPES, pH 7.4, 20mM NaCl, 10% glycerol, 1% Triton X-100). Lysates were subjected to standard SDS-polyacrylamide gel electrophoresis (10 $\mu$ g protein/lane) and western blotting procedures using the following primary antibodies: Anti-IRF8 (Cell Signaling, Danvers, MA), Anti-STAT3, anti-pSTAT3, anti-STAT1 and anti-pSTAT1 (BD Biosciences, San Diego, CA), Anti-DNMT1 and Anti-DNMT3b (Abcam, Cambridge, MA). Anti- $\beta$ -actin (Sigma-Aldrich, St Louis, MO). Anti-Rabbit-HRP (1:5000), Anti-Mouse-HRP (1:5000) secondary antibodies (Cell Signaling, Danvers, MA). Signal was detected using the enhanced chemiluminescence system (ECL; Perkin Elmer, Waltham, MA) and the Xray Film Processor Konica SRX-101A (Konica Minolta, Tokyo, Japan).

### Chromatin Immunoprecipitation (ChIP)

ChIP was performed using anti-pSTAT3 (Cell Signaling, Danvers, MA) and the Chromatin Immunoprecipitation (ChIP) Assay Kit (Millipore, Burlington, MA) according to the manufacturer's instructions. Normal rabbit IgG-AC (Santa Cruz Biotechnology, Dallas, TX) was used as negative control for the antibody. The immunoprecipitated genomic DNA was amplified by qPCR using 3 pairs of PCR primers ([Table S1](#)) covering the region of the *DNMT1* and *DNMT3b* promoter regions.

### Luciferase Reporter Assay

Luciferase reporter assay was performed to assess the transcriptional activation of DNMT1 and DNMT3b via the STAT3 bound DNA elements in two different regions of their promoters. For the *DNMT1* P1 promoter region (–2535 to –1629), the *DNMT1* promoter region was amplified from genomic DNA isolated from CCD841 cell line with primers designed from ENSEMBLE GenBank sequence: forward: GTACTCGAGTCCAGGCACACACTACCATTTC and reverse: CATAAGCTTCGGGTTCAAGCGATTCTTCTG. Extra nucleotides were added to both ends to generate Xho1 and HindIII unique restriction sites, respectively. The resultant 987-bp PCR product was gel purified and cloned into the pGL3-basic luciferase reporter construct (Promega, Madison, WI) to generate the *DNMT1*-promoter P1-pGL3 construct. For *DNMT3b* P3 promoter region (–3289 to –2364), the *DNMT3b* promoter region was amplified from genomic DNA isolated from CCD841 cell line with primers designed from ENSEMBLE GenBank sequence. Forward: ACTCGG TACCTGTAAAGAAAGGCTGGACGGC and reverse: CATAAGCTTAAATAAACAGGTCTATGGGGAGGG. Extra nucleotides were added to both ends to generate KpnI and HindIII unique restriction sites, respectively. The resultant 926-bp PCR product was gel purified and cloned into the pGL3-basic luciferase reporter construct (Promega, Madison, WI) to generate the *DNMT3b*-promoter P3-pGL3 construct. DNMT1 P2 (–1304 to +179) Promoter-PGL3 construct and DNMT3b P4 (–1263 to +210) promoter-PGL3 construct were obtained from Genecopoeia (Rockville, MD). CCD841 and HT29 were transiently transfected with each of these plasmids or basic PGL3 vector using Lipofectamine 2000 (Invitrogen, Carlsbad, CA) according to manufacturer's directions. Twenty-four hr after transfection, the cells were untreated or treated with recombinant human IL10 (Biolegend, San Diego, CA) at 100 ng/mL for 4 hr. Cells were then washed and lysed. The cell lysates were incubated with luciferon (Promega, Madison, WI) and analyzed for luciferase activity in a Cytation5 imaging reader (Biotek, Winooski, VT). The *IRF8* Promoter PGL3 construct was kindly provided by Dr. Scott Abrams (Roswell Park Comprehensive Cancer Center, Buffalo, NY). To methylate the DNA, the *IRF8* promoter-PGL3 was incubated with M.SssI (New England Biolabs, Ipswich, MA) at 37°C for 1 h. The reaction was stopped by incubation at 65°C for 20 min. The DNA was purified using the PCR purification kit (QIAGEN, Helden, Germany) according to manufacturer's directions. CCD841 and HT29 were transiently transfected with methylated or unmethylated *IRF8* Promoter-PGL3 plasmid using Lipofectamine 2000 (Invitrogen, Carlsbad, CA) according to manufacturer's directions. 24 hr after transfection, cells were lysed and incubated with luciferon (Promega, Madison, WI), analyzed for luciferase activity in a Cytation5 imaging reader (Biotek, Winooski, VT).

### Immunohistochemistry

Colon tissues were prepared as SWISS rolls and fixed in 10% formalin overnight. The fixed tissues were processed into paraffin blocks and cut into sections. Sections were dewaxed with Xylene and hydrated in 100%, 90%, 70% and 50% ethanol sequentially. Antigen retrieval was performed using Antigen Unmasking Solution (Vector Lab, Burlingame, CA). Slides were then incubated in 0.3% hydrogen peroxidase for 20 min at room temperature, washed in water, blocked with 2.5% Normal Horse Serum (Vector Lab, Burlingame, CA) for 1 hr, then probed with Anti-Ki67 antibody (Novus, Littleton, CO) overnight at 4°C. Slides were washed three times with PBS-Tween and incubated with HRP Universal Anti-Mouse IgG/Anti-Rabbit IgG Antibody (Vector Lab, Burlingame, CA) for 1 hr.



Sections were exposed to ImmPACT DAB Peroxidase Substrate (Vector Lab, Burlingame, CA) for 5 min, washed and counterstained with Harris Hematoxylin (Sigma Aldrich, St. Louis, MO), and incubated for 1 min with 0.1% Sodium Bicarbonate as a bluing reagent. Slides were mounted in VectaMount Permanent Mounting Medium (Vector Lab, Burlingame, CA) and examined under microscope. Ki67<sup>+</sup> cells at the bottom of crypts were counted. *In situ* TUNEL staining was performed using ApopTag® Plus Peroxidase *In Situ* Apoptosis Kit (Millipore, Burlington, MA) according to the manufacturer's instructions. For each quantification, at least 20 crypts per mouse and at least 3 experimental mice per condition were analyzed. For inflammation score of H&E stained slides, each grade represent the following: Grade 0: Normal colonic mucosa, Grade 1: Loss of one-third of the crypts, Grade 2: Loss of two-thirds of the crypts, Grade 3: The lamina propria is covered with a single layer of epithelium and mild inflammatory cell infiltration is present, Grade 4: Erosions and marked inflammatory cell infiltration are present. Scale bar has been calculated with LAS V4.1 software then extrapolated to all images with the same magnification power.

### TCGA database analysis

Human datasets of DNMT1, DNMT3b and IRF8 expression in human primary tumor and normal solid tissue was extracted from TCGA Colon and Rectal Cancer (COADREAD) ploy A<sup>+</sup> IlluminaHiSeq pancan normalized RNA seq dataset using UCSC Xena Cancer Genomics Browser. Human clinical datasets of the *IRF8* promoter methylation level in human primary tumor and normal solid tissue was extracted from TCGA Colon Cancer (COAD) dataset using MethHC database of DNA Methylation and gene expression in Human Cancer Browser.

### QUANTIFICATION AND STATISTICAL ANALYSIS

Statistical and graphical analyses was performed using Graphpad Prism and Microsoft Excel 2016. Statistical comparisons between any two groups were conducted using unpaired two-tailed Student's t test and *p* values were indicated in their corresponding graphs. *p* < 0.05 were considered as statistically significant, and Error bars are indicated as mean ± SD. The immunofluorescence and immunohistochemistry analysis were conducted on mouse tissues for at least 3 sections of at least 3 mice per experimental condition. For each quantification, at least 20 crypts per mouse, and at least 3 experimental mice per condition were analyzed. All flow cytometry data were obtained from at least 3 mice per experimental condition.

**Cell Reports, Volume 25**

**Supplemental Information**

**Myeloid-Derived Suppressor Cells Produce IL-10  
to Elicit DNMT3b-Dependent IRF8 Silencing  
to Promote Colitis-Associated Colon Tumorigenesis**

**Mohammed L. Ibrahim, John D. Klement, Chunwan Lu, Priscilla S. Redd, Wei Xiao, Dafeng Yang, Darren D. Browning, Natasha M. Savage, Phillip J. Buckhaults, Herbert C. Morse III, and Kebin Liu**

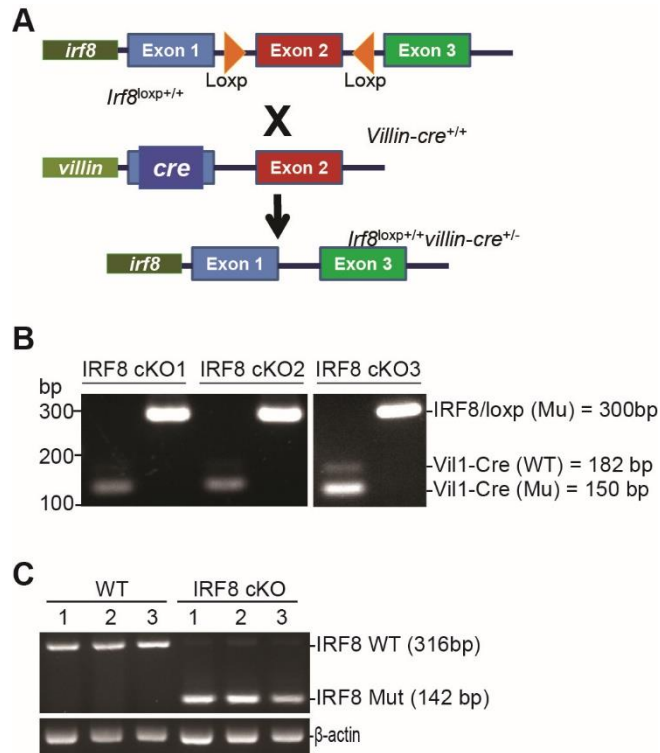

**Figure S1. Creation of the IRF8 cKO mouse. Related to Figures 1 and 2.** (A) Diagram of creation of mice with IRF8 deficiency in the colonic epithelial cells (termed IRF8 cKO mouse). (B) DNA was extracted from mouse tail snaps and analyzed by PCR. The genotypes of 3 homozygous IRF8 cKO mice are shown. (C) RNA was extracted from colon tissues of WT (n=3) and IRF8 cKO (n=3) mice, and analyzed by RT-PCR using a PCR primer pair flanking the exon 2 of *irf8* cDNA. The WT IRF8 (IRF8 WT) and truncated mutant IRF8 (IRF8 Mut) are indicated at the right.

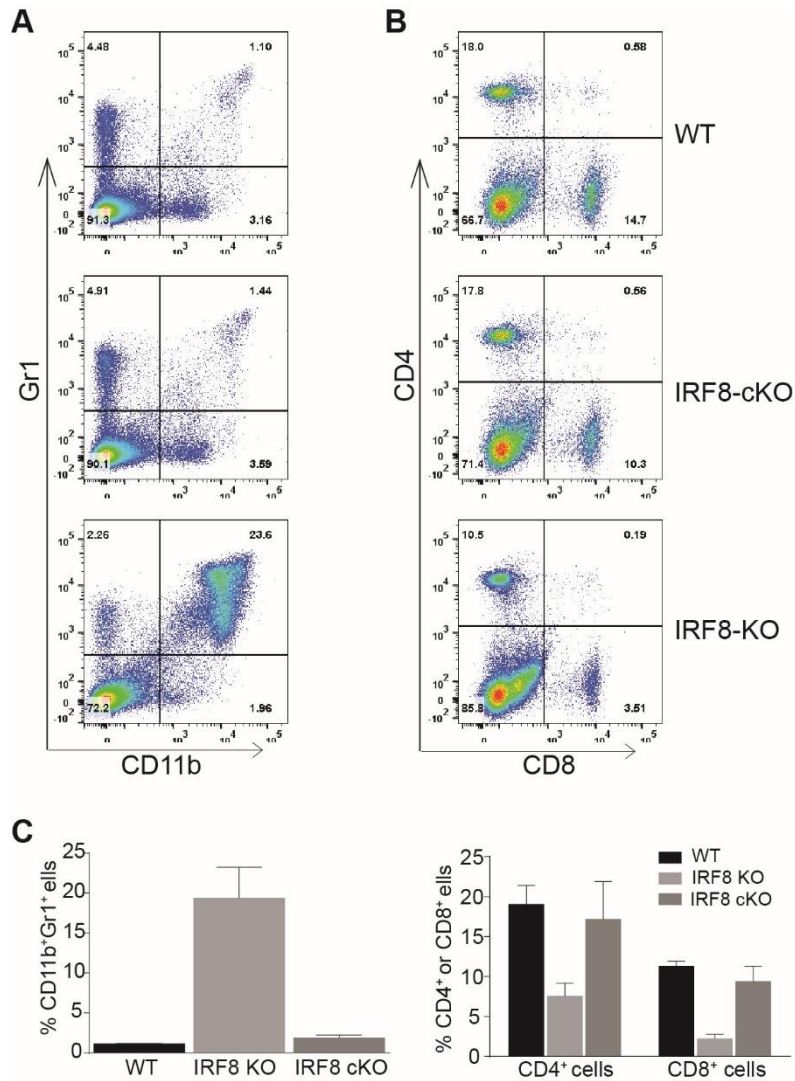

**Figure S2. MDSC and T cell profiles in WT and IRF8-deficient mice. Related to Figure 1.** (A & B). Cells were prepared from spleens of aged matched WT (n=3), IRF8KO (n=3) and IRF8cKO (n=3) mice. Cells were stained with CD11b- and Gr1-specific (A), and CD4- and CD8-specific (B) antibodies and analyzed by flow cytometry. Shown are representative flow cytometry plots. (C) Quantification of percentages of CD11b<sup>+</sup>Gr1<sup>+</sup>, CD4<sup>+</sup> and CD8<sup>+</sup> cells as shown in A and B. Column: mean; Bar: SD.



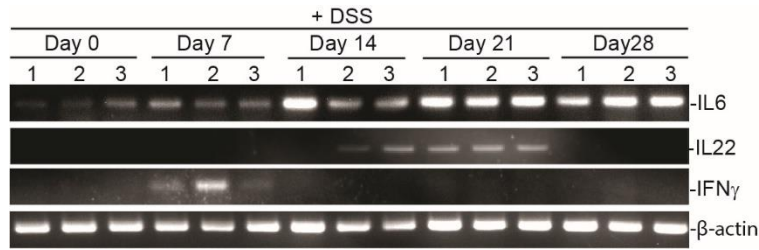

**Figure S3. Cytokine expression levels in DSS-treated mouse colon. Related to Figures 4 and 5.** WT C57BL/6 mice were treated with the 2% DSS-water cycle as described in the experimental procedures. Colon tissues were collected from mice at the indicated time points and analyzed by RT-PCR for IL6, IL22 and IFN $\gamma$  mRNA levels.  $\beta$ -actin was used as normalization control.

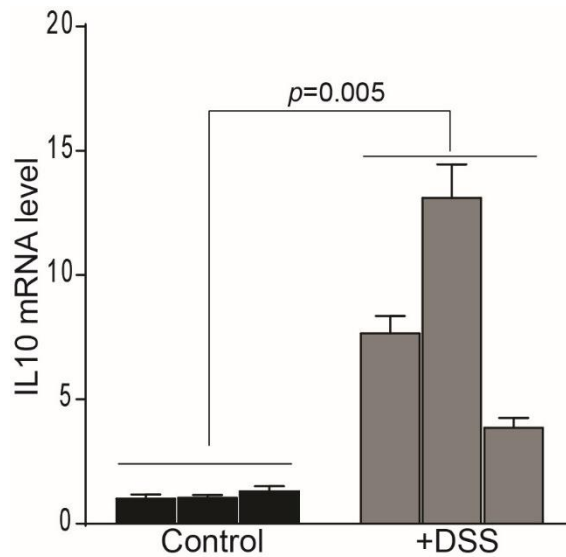

**Figure S4. Inflammation induces IL10 up-regulation in colon. Related to Figure 5.** C57BL/6 mice were treated with 2% DSS as described in the experimental procedures. CD11b<sup>+</sup>Gr1<sup>+</sup> MDSCs were purified from mouse spleens at day 21 and analyzed by qPCR for IL10 mRNA level with  $\beta$ -actin as internal control.

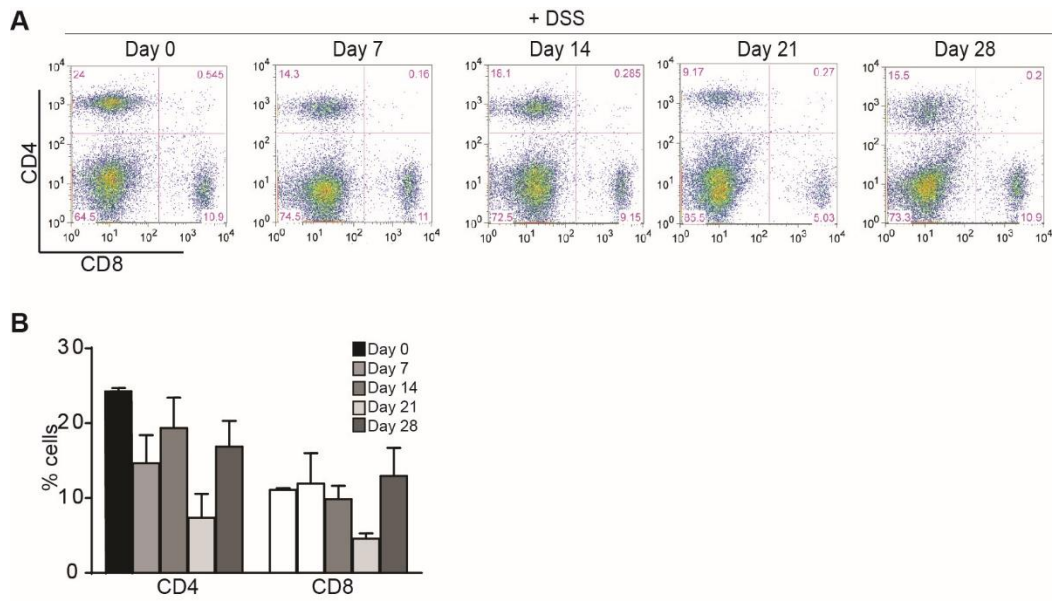

**Figure S5. Effects of chronic inflammation on T cell profile. A. Related to Figure 5.** (A) WT mice were treated with DSS as described in the experimental procedures and analyzed for CD4<sup>+</sup> and CD8<sup>+</sup> T cells in the spleens at the indicated time. Shown are representative results of one of three mice. (B) Quantification of percentages of CD4<sup>+</sup> and CD8<sup>+</sup> cells as shown in A. Column: mean; Bar: SD.

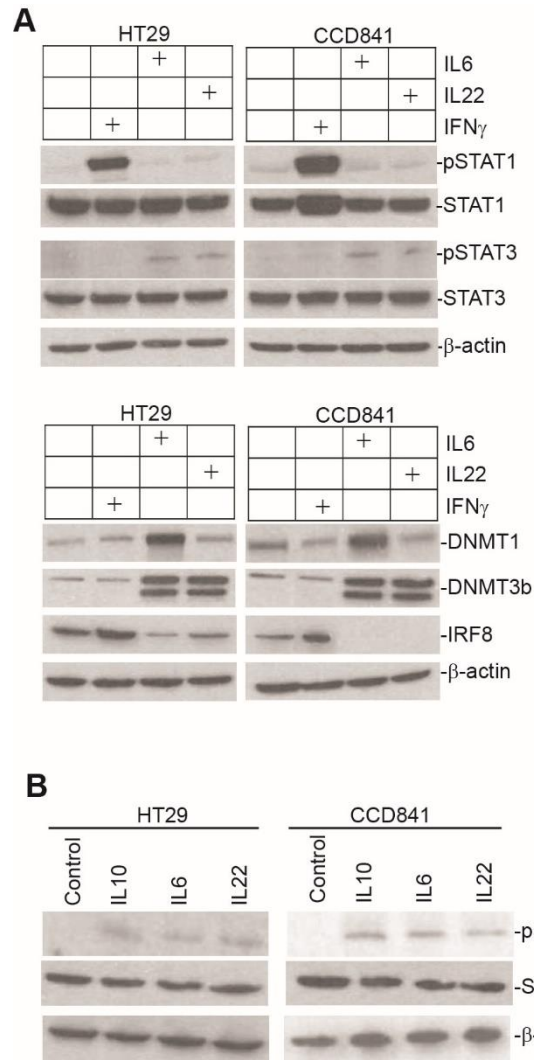

**Figure S6. Cytokine regulation of gene expression in normal colon epithelial and colon carcinoma cells in vitro. Related to Figures 6 and 7.** (A) HT29 and CCD841 cells were treated with recombinant IL6, IL22 and IFN $\gamma$  for 24 hours and analyzed for the indicated proteins by Western blotting. (B) HT29 and CCD841 cells were treated with recombinant IL10, IL6, and IL22 for 2 hours and analyzed for the indicated proteins by Western blotting.

**Table S1. Oligonucleotide Sequences\*. Related to Figures 1, 2, 3, 4, 5, 6, and 7.**

| Oligo Name         | Sequence (5'-3')                   | Application                               |
|--------------------|------------------------------------|-------------------------------------------|
| mIRF8-F            | GATCGAACAGATCGACAGCA               |                                           |
| mIRF8-B            | GCTGGTTCAGCTTTGTCTCC               | RT-PCR                                    |
| mDNMT1-F           | TTGATGGTGGCGAGAAGGTG               |                                           |
| mDNMT1-B           | AATGGTAGAAGGAGGAACAGTGGTC          | RT-PCR                                    |
| mDNMT3A-F          | CCAGCCAAGAAACCCAGAAAAG             |                                           |
| mDNMT3A-B          | AGCAATCCCATCAAAGAGAGACAG           | RT-PCR                                    |
| mDNMT3b-F          | CAAACCCAAACAAGAAGCAACCAG           |                                           |
| mDNMT3b-B          | CCAGACTCCACACAGAAGCATC             | RT-PCR                                    |
| mCD11b-F           | GCAGTCATCTTGAGGAACCGTG             |                                           |
| mCD11b-B           | AGTTGGTATTGCCATCAGCGTC             | RT-PCR                                    |
| mIL10-F            | GCTGGACAACATACTGCTAACCGAC          |                                           |
| mIL10-B            | CTTGCTTTATTTTTCACAGGGGAG           | RT-PCR                                    |
| mIL6-F             | TCTGGGAAATCGTGGAAATGAG             |                                           |
| mIL6-B             | TCTCTGAAGGACTCTGGCTTTGTC           | RT-PCR                                    |
| mIL22-F            | CGTCAACCGCACCTTTATGC               |                                           |
| mIL22-B            | TTCTGGATGTTCTGGTCGTCACCG           | RT-PCR                                    |
| mIFNG-F            | CCATCAGCAACAACATAAGCGTC            |                                           |
| mIFNG-B            | TCTCTTCCCCACCCCGAATCAGCAG          | RT-PCR                                    |
| mKi67-F            | CATCATTGACCGCTCCTTTAGG             |                                           |
| mKi67-B            | TGTTTCTGCCAGTGTGCTGTCTAC           | RT-PCR                                    |
| mβ-actin-F         | ATTGTTACCAACTGGGACGACATG           |                                           |
| mβ-actin-B         | CTTCATGAGGTAGTCTGTGAGGTC           | RT-PCR                                    |
| mβ-actin-Q-F       | CTGGCACACACCTTCTACAATG             |                                           |
| mβ-actin-Q-B       | GGGTCATCTTTTTCACGGTTGG             | qPCR                                      |
| mIRF8exon1F        | GCGCGGGCAGCGTGGGAACCGCG            |                                           |
| mIRF8exon3B        | GTCACCTCTTCAAAATCTGGGCTC           | RT-PCR: IRF8 cKO                          |
| mIRF8-CpGI-F       | GGGATAGAGGTTTTTTAAATTTGAA          |                                           |
| mIRF8-CpGI-B       | AACAACCAAAACAACACCTACTAAC          | BS-PCR of <i>irf8</i> promoter CpG island |
| mIRF8-MSP-U-F      | TTTTGGGGTAGTTTTTTTTTTTGTGTTTTT     |                                           |
| mIRF8-MSP-U-B      | TCCCACACAAAAACAACATCACACA          | MS-PCR of <i>irf8</i> promoter CpG island |
| mIRF8-MSP-M-F      | TGGGGTAGTTTTTTTTTTTTCGCTGTTTTT     |                                           |
| mIRF8-MSP-M-B      | GCGCGCAAAACGACGATCGCGCG            | MS-PCR of <i>irf8</i> promoter CpG island |
| Tg-Vil1-Cre-Common | GCCTTCTCCTCTAGGCTCGT               |                                           |
| Tg-Vil1-Cre-Wild   | TATAGGGCAGAGCTGGAGGA               | Genotyping <i>villin-cre</i> mouse        |
| Tg-Vil1-Cre-Mutant | AGGCAAATTTTGGGTACGG                |                                           |
| IRF8-Floxp-F       | TTGGGGATTTCCAGGCTGTTCTA            |                                           |
| IRF8-Floxp-B       | CACAGGGAGTCCCTCTTACAAT             | Genotyping <i>irf8 floxp</i> mouse        |
| hDNMT1-XhoI-F      | GTACTCGAG TCCAGGCACACTACCATT       |                                           |
| hDNMT1-HindIII-B   | CATAAGCTT CGGGTTCAAGCGATTCTTCTG    | PGL3-Cloning                              |
| hDNMT3b-KpnI-F     | ACTCGGTACC TGTAAGAAAGGCTGGACGGC    |                                           |
| hDNMT3b-HindIII-B  | CATAAGCTT AAATAAACAGGTCTATGGGGAGGG | PGL3-Cloning                              |
| hDNMT3b-ChIP1-F    | TTTGTGCCAGAAAGCCAA                 |                                           |
| hDNMT3b-ChIP1-B    | CCAGGTGAGTAAATGAGTGAAGGG           | ChIP                                      |
| hDNMT3b-ChIP2-F    | GTGCTGTTTTCCAGTGGTTCAATG           |                                           |
| hDNMT3b-ChIP2-B    | TGCCTGTCACTCTGCTTTGG               | ChIP                                      |
| hDNMT3b-ChIP3-F    | AATTACCTGGCCTCTGCTTTGG             |                                           |
| hDNMT3b-ChIP3-B    | GCTCTTCCATAAGCTGGGATTG             | ChIP                                      |
| hDNMT1-ChIP1-F     | GCCTGGGAGATAAAGGAAGACTCTG          |                                           |
| hDNMT1-ChIP2-B     | GCGGAAATGATGGACACTACACC            | ChIP                                      |
| hDNMT1-ChIP3-F     | GACCCCATCTCTACAAAAAAGCTGC          |                                           |
| hDNMT1-ChIP2-B     | TAAGTGCCTACTGTGTGCCACCC            | ChIP                                      |
| hDNMT1-ChIP3-F     | TGAGCGAGGGCAAAAGGATG               |                                           |
| hDNMT1-ChIP3-B     | AGTTGAAAGAGGAGGCGTCTGAG            | ChIP                                      |
| hDNMT1-F           | GAAGGAGGCAGATGACGATGAG             |                                           |
| hDNMT1-B           | AATAACAGAGACACAGTCCCCAC            | RT-PCR                                    |
| hDNMT3b-F          | CCAACAACAAGAGCAGCTGG               |                                           |
| hDNMT3b-B          | GCACTCCACACAGAAACACCG              | RT-PCR                                    |
| hIRF8-CpGI-F       | TTTTGAAGTTGGGATTTTTTGTGTTT         |                                           |
| hIRF8-CpGI-B       | TAAAATCCRAACCTCTCTAAAACC           | RT-PCR                                    |
| hIRF8-MSP-U-F      | CCATCCCATAAAAATAACACACAACAAA       |                                           |
| hIRF8-MSP-U-B      | GATGGTGTAGATGTGTGTTTGTGGTTT        | MS-PCR of <i>IRF8</i> promoter CpG island |
| hIRF8-MSP-M-F      | TCCCGTAAAATAACGCGCAGCAA            |                                           |
| hIRF8-MSP-M-B      | CGGTGTAGACGTGCGTTTGCCTTTT          | MS-PCR of <i>IRF8</i> promoter CpG island |
| hIRF8-F            | GCTCATCCAATCTCCCAAGTCTC            |                                           |
| hIRF8-B            | CTCTATTCGCCTGTGAACCTCATC           | RT-PCR                                    |
| hβ-actin-F         | GGAACGGTGAAGGTGACAGCAG             |                                           |
| hβ-actin-B         | TGTGGACTTGGGAGAGGACTGG             | RT-PCR                                    |
| hβ-actin-Q-F       | TGAAGGTGACAGCAGTGGTTG              |                                           |
| hβ-actin-Q-B       | GGCTTTTAGGATGGCAAGGGAC             | qPCR                                      |

\*m: mouse; h:human
